# Supplementary material for: Comparison of Autof ms1000 and Bruker Biotyper MALDI-TOF MS Platforms for Routine Identification of Clinical Microorganisms
Source: Biomed Res Int. 2021 Mar 3;2021:6667623. doi: 10.1155/2021/6667623 (PMC7952152; doi:10.1155/2021/6667623)
Supplement: Supplementary Materials — Supplementary File 1: the MALDI-TOF MS results in preserved strains and clinical isolates. [file 6667623.f1.xlsx]

## Sheet: clinical
SpecimenNo	TestOrder_Autof	Result_Autof	Range_Autof	TestOrder_Bruker	Result_Bruker	Score_Bruker	Reference_16S/ITS
C001	1_DT	Citrobacter freundii	9.525	1_DT	Citrobacter freundii	2.29
C001	2_DT	Citrobacter freundii	9.583	2_DT	Citrobacter freundii	2.367
C002	1_DT	Proteus mirabilis	9.605	1_DT	Proteus mirabilis	2.298
C002	2_DT	Proteus mirabilis	9.674	2_DT	Proteus mirabilis	2.399
C003	1_DT	Raoultella ornithinolytica	9.59	1_DT	Raoultella ornithinolytica	2.467
C003	2_DT	Raoultella ornithinolytica	9.634	2_DT	Raoultella ornithinolytica	2.487
C004	1_DT	Escherichia coli	9.605	1_DT	Escherichia coli	2.331
C004	2_DT	Escherichia coli	9.568	2_DT	Escherichia coli	2.322
C005	1_DT	Enterococcus faecalis	9.672	1_DT	Enterococcus faecalis	2.152
C005	2_DT	Enterococcus faecalis	9.703	2_DT	Enterococcus faecalis	2.353
C006	1_DT	Enterococcus faecalis	9.656	1_DT	Enterococcus faecalis	2.028
C006	2_DT	Enterococcus faecalis	9.587	2_DT	Enterococcus faecalis	2.031
C007	1_DT	Stenotrophomonas maltophilia	9.5	1_DT	Stenotrophomonas maltophilia	2.284
C007	2_DT	Stenotrophomonas maltophilia	9.403	2_DT	Stenotrophomonas maltophilia	2.23
C008	1_DT	Enterococcus faecium	9.592	1_DT	Enterococcus faecium	2.344
C008	2_DT	Enterococcus faecium	9.588	2_DT	Enterococcus faecium	2.424
C009	1_DT	Escherichia coli	9.698	1_DT	Escherichia coli	2.28
C009	2_DT	Escherichia coli	9.694	2_DT	Escherichia coli	2.215
C010	1_DT	Pseudomonas aeruginosa	9.573	1_DT	Pseudomonas aeruginosa	2.363
C010	2_DT	Pseudomonas aeruginosa	9.49	2_DT	Pseudomonas aeruginosa	2.42
C011	1_DT	Elizabethkingia meningoseptica	9.587	1_DT	Elizabethkingia meningoseptica	2.341
C011	2_DT	Elizabethkingia meningoseptica	9.645	2_DT	Elizabethkingia meningoseptica	2.433
C012	1_DT	Staphylococcus aureus	9.513	1_DT	Staphylococcus aureus	2.114
C012	2_DT	Staphylococcus aureus	9.364	2_DT	Staphylococcus aureus	2.19
C013	1_DT	Staphylococcus aureus	9.513	1_DT	Staphylococcus aureus	2.236
C013	2_DT	Staphylococcus aureus	9.434	2_DT	Staphylococcus aureus	2.301
C014	1_DT	Staphylococcus aureus	9.574	1_DT	Staphylococcus aureus	2.363
C014	2_DT	Staphylococcus aureus	9.188	2_DT	Staphylococcus aureus	1.951
C015	1_DT	Enterobacter hormaechei	9.672	1_DT	Enterobacter cloacae	2.235
C015	2_DT	Enterobacter hormaechei	9.597	2_DT	Enterobacter cloacae	2.382
C016	1_DT	Staphylococcus aureus	9.623	1_DT	Staphylococcus aureus	1.933
C016	2_DT	Staphylococcus aureus	9.632	2_DT	Staphylococcus aureus	2.367
C017	1_DT	Staphylococcus aureus	9.592	1_DT	Staphylococcus aureus	2.261
C017	2_DT	Staphylococcus aureus	9.305	2_DT	Staphylococcus aureus	2.134
C018	1_DT	Klebsiella pneumoniae	9.555	1_DT	Klebsiella pneumoniae	2.276
C018	2_DT	Klebsiella pneumoniae	9.536	2_DT	Klebsiella pneumoniae	2.323
C019	1_DT	Staphylococcus aureus	9.184	1_DT	Staphylococcus aureus	2.045
C019	2_DT	Staphylococcus aureus	9.665	2_DT	Staphylococcus aureus	2.359
C020	1_DT	Klebsiella pneumoniae	9.503	1_DT	Klebsiella pneumoniae	2.325
C020	2_DT	Klebsiella pneumoniae	9.333	2_DT	Klebsiella pneumoniae	2.275
C021	1_FA	Candida krusei(Issatchenkia orientalis)	5.977	1_FA	Candida krusei	1.948
C021	2_FA	Candida krusei(Issatchenkia orientalis)	9.182	2_FA	Candida krusei	2.117
C022	1_DT	Staphylococcus aureus	9.641	1_DT	Staphylococcus aureus	1.981
C022	2_DT	Staphylococcus aureus	9.319	2_DT	Staphylococcus aureus	2.128
C023	1_DT	Staphylococcus epidermidis	9.498	1_DT	Staphylococcus epidermidis	2.159
C023	2_DT	Staphylococcus epidermidis	8.238	2_DT	Staphylococcus epidermidis	1.972
C024	1_FA	Candida albicans	9.312	1_FA	Candida albicans	2.055
C024	2_FA	Candida albicans	9.467	2_FA	Candida albicans	1.977
C025	1_DT	Proteus mirabilis	9.56	1_DT	Proteus mirabilis	2.318
C025	2_DT	Proteus mirabilis	9.651	2_DT	Proteus mirabilis	2.43
C026	1_DT	Citrobacter braakii	9.523	1_DT	Citrobacter freundii	1.804
C026	2_DT	Citrobacter freundii	9.368	2_DT	Citrobacter braakii	2.176
C027	1_DT	Staphylococcus aureus	9.546	1_DT	Staphylococcus aureus	2.145
C027	2_DT	Staphylococcus aureus	7.503	2_DT	Staphylococcus aureus	1.964
C028	1_DT	Klebsiella pneumoniae	9.583	1_DT	Klebsiella pneumoniae	2.237
C028	2_DT	Klebsiella pneumoniae	9.52	2_DT	Klebsiella pneumoniae	2.101
C029	1_DT	Enterococcus faecalis	9.719	1_DT	Enterococcus faecalis	2.379
C029	2_DT	Enterococcus faecalis	9.671	2_DT	Enterococcus faecalis	2.314
C030	1_DT	Enterococcus faecalis	9.54	1_DT	Enterococcus faecalis	1.975
C030	2_DT	Enterococcus faecalis	9.55	2_DT	Enterococcus faecalis	2.438
C031	1_DT	Escherichia coli	9.705	1_DT	Escherichia coli	2.433
C031	2_DT	Escherichia coli	9.633	2_DT	Escherichia coli	2.372
C032	1_DT	Morganella morganii	9.705	1_DT	Morganella morganii	2.231
C032	2_DT	Morganella morganii	9.759	2_DT	Morganella morganii	2.177
C033	1_DT	Proteus mirabilis	9.54	1_DT	Proteus mirabilis	2.363
C033	2_DT	Proteus mirabilis	9.7	2_DT	Proteus mirabilis	2.362
C034	1_DT	Enterobacter aerogenes	9.601	1_DT	Enterobacter aerogenes	2.27
C034	2_DT	Enterobacter aerogenes	9.432	2_DT	Enterobacter aerogenes	2.263
C035	1_DT	Stenotrophomonas maltophilia	9.388	1_DT	Stenotrophomonas maltophilia	2.101
C035	2_DT	Stenotrophomonas maltophilia	9.053	2_DT	Stenotrophomonas maltophilia	2.263
C036	1_DT	Enterobacter asburiae	9.55	1_DT	Enterobacter asburiae	1.94
C036	2_DT	Enterobacter asburiae	9.522	2_DT	Enterobacter asburiae	2.018
C037	1_DT	Enterococcus faecalis	9.602	1_DT	Enterococcus faecalis	2.096
C037	2_DT	Enterococcus faecalis	9.712	2_DT	Enterococcus faecalis	2.353
C038	1_DT	Staphylococcus epidermidis	9.349	1_DT	Staphylococcus epidermidis	2.072
C038	2_DT	Staphylococcus epidermidis	9.404	2_DT	Staphylococcus epidermidis	2.192
C039	1_DT	Raoultella ornithinolytica	9.703	1_DT	Raoultella ornithinolytica	2.389
C039	2_DT	Raoultella ornithinolytica	9.634	2_DT	Raoultella ornithinolytica	2.42
C040	1_DT	Staphylococcus capitis	9.277	1_DT	Staphylococcus capitis	2.161
C040	2_DT	Staphylococcus capitis	6.851	2_DT	Staphylococcus capitis	2.21
C041	1_DT	Enterobacter cloacae	9.466	1_DT	Enterobacter asburiae	2.062
C041	2_DT	Enterobacter cloacae	9.543	2_DT	Enterobacter asburiae	2.103
C042	1_DT	Klebsiella pneumoniae	9.371	1_DT	Klebsiella pneumoniae	2.132
C042	2_DT	Klebsiella pneumoniae	9.663	2_DT	Klebsiella pneumoniae	2.272
C043	1_DT	Pseudomonas aeruginosa	9.64	1_DT	Pseudomonas aeruginosa	2.387
C043	2_DT	Pseudomonas aeruginosa	9.596	2_DT	Pseudomonas aeruginosa	2.37
C044	1_DT	Acinetobacter baumannii	9.567	1_DT	Acinetobacter baumannii	2.361
C044	2_DT	Acinetobacter baumannii	9.562	2_DT	Acinetobacter baumannii	2.389
C045	1_DT	Staphylococcus aureus	9.685	1_DT	Staphylococcus aureus	2.381
C045	2_DT	Staphylococcus aureus	9.074	2_DT	Staphylococcus aureus	2.383
C046	1_DT	Staphylococcus aureus	9.111	1_DT	Staphylococcus aureus	1.923
C046	2_DT	Staphylococcus aureus	9.481	2_DT	Staphylococcus aureus	2.293
C047	1_DT	Haemophilus influenzae	5.144	1_DT	Haemophilus influenzae	2.356
C047	2_DT	Haemophilus influenzae	9.404	2_DT	Haemophilus influenzae	2.31
C048	1_DT	Haemophilus influenzae	9.522	1_DT	Haemophilus influenzae	2.462
C048	2_DT	Haemophilus influenzae	9.603	2_DT	Haemophilus influenzae	2.497
C049	1_DT	Klebsiella pneumoniae	9.754	1_DT	Klebsiella pneumoniae	2.303
C049	2_DT	Klebsiella pneumoniae	9.725	2_DT	Klebsiella pneumoniae	2.415
C050	1_DT	Staphylococcus epidermidis	9.553	1_DT	Staphylococcus epidermidis	2.099
C050	2_DT	Staphylococcus epidermidis	9.566	2_DT	Staphylococcus epidermidis	2.135
C051	1_FA	Streptococcus pneumoniae	4.786	1_FA	Candida auris	1.784	Candida auris
C051	2_FA	Pseudomonas oryzihabitans	4.928	2_FA	Candida auris	1.721	Candida auris
C051	3_EtOH/FA	Pseudomonas aeruginosa	4.952	3_EtOH/FA	Candida auris	2.073	Candida auris
C052	1_DT	Enterococcus faecium	9.685	1_DT	Enterococcus faecium	2.495
C052	2_DT	Enterococcus faecium	9.657	2_DT	Enterococcus faecium	2.47
C053	1_DT	Enterococcus faecalis	9.634	1_DT	Enterococcus faecalis	2.388
C053	2_DT	Enterococcus faecalis	9.678	2_DT	Enterococcus faecalis	2.369
C054	1_DT	Klebsiella pneumoniae	9.589	1_DT	Klebsiella pneumoniae	2.353
C054	2_DT	Klebsiella pneumoniae	9.626	2_DT	Klebsiella pneumoniae	2.404
C055	1_DT	Enterococcus faecium	9.678	1_DT	Enterococcus faecium	2.535
C055	2_DT	Enterococcus faecium	9.721	2_DT	Enterococcus faecium	2.497
C056	1_DT	Proteus mirabilis	9.685	1_DT	Proteus mirabilis	2.385
C056	2_DT	Proteus mirabilis	9.693	2_DT	Proteus mirabilis	2.418
C057	1_FA	Candida lusitaniae(Clavispora lusitaniae)	9.369	1_FA	no peaks found	0
C057	2_FA	Candida lusitaniae(Clavispora lusitaniae)	9.532	2_FA	Candida lusitaniae	2.073
C058	1_DT	Staphylococcus hominis	9.51	1_DT	Staphylococcus hominis	2.117
C058	2_DT	Staphylococcus hominis	9.528	2_DT	Staphylococcus hominis	2.193
C059	1_DT	Staphylococcus hominis	9.501	1_DT	Staphylococcus hominis	2.1
C059	2_DT	Staphylococcus hominis	9.508	2_DT	Staphylococcus hominis	2.227
C060	1_DT	Enterobacter aerogenes	9.541	1_DT	Enterobacter aerogenes	2.337
C060	2_DT	Enterobacter aerogenes	9.584	2_DT	Enterobacter aerogenes	2.315
C061	1_DT	Serratia marcescens	9.543	1_DT	Serratia marcescens	2.325
C061	2_DT	Serratia marcescens	9.54	2_DT	Serratia marcescens	2.233
C062	1_DT	Pseudomonas aeruginosa	9.664	1_DT	Pseudomonas aeruginosa	2.319
C062	2_DT	Pseudomonas aeruginosa	9.662	2_DT	Pseudomonas aeruginosa	2.317
C063	1_DT	Klebsiella pneumoniae	9.599	1_DT	Klebsiella variicola	2.356
C063	2_DT	Klebsiella pneumoniae	9.636	2_DT	Klebsiella variicola	2.337
C064	1_DT	Escherichia coli	9.554	1_DT	Escherichia coli	2.432
C064	2_DT	Escherichia coli	9.574	2_DT	Escherichia coli	2.438
C065	1_DT	Staphylococcus aureus	9.651	1_DT	Staphylococcus aureus	2.145
C065	2_DT	Staphylococcus aureus	9.666	2_DT	Staphylococcus aureus	2.205
C066	1_DT	Acinetobacter baumannii	9.566	1_DT	Acinetobacter baumannii	2.415
C066	2_DT	Acinetobacter baumannii	9.381	2_DT	Acinetobacter baumannii	2.171
C067	1_DT	Pseudomonas aeruginosa	9.662	1_DT	Pseudomonas aeruginosa	2.338
C067	2_DT	Pseudomonas aeruginosa	9.688	2_DT	Pseudomonas aeruginosa	2.328
C068	1_DT	Staphylococcus haemolyticus	9.481	1_DT	Staphylococcus haemolyticus	2.142
C068	2_DT	Staphylococcus haemolyticus	9.62	2_DT	Staphylococcus haemolyticus	2.217
C069	1_DT	Rhodotorula mucilaginosa	9.536	1_DT	no peaks found	0
C069	2_DT	Rhodotorula mucilaginosa	9.474	2_DT	Rhodotorula mucilaginosa	2.267
C070	1_DT	Escherichia coli	9.71	1_DT	Escherichia coli	2.324
C070	2_DT	Escherichia coli	9.673	2_DT	Escherichia coli	2.456
C071	1_DT	Morganella morganii	9.696	1_DT	Morganella morganii	2.18
C071	2_DT	Morganella morganii	9.748	2_DT	Morganella morganii	2.193
C072	1_DT	Staphylococcus epidermidis	9.542	1_DT	Staphylococcus epidermidis	2.197
C072	2_DT	Staphylococcus epidermidis	9.55	2_DT	Staphylococcus epidermidis	2.124
C073	1_DT	Enterococcus faecium	9.743	1_DT	Enterococcus faecium	2.472
C073	2_DT	Enterococcus faecium	9.5	2_DT	Enterococcus faecium	2.471
C074	1_DT	Pseudomonas aeruginosa	9.712	1_DT	Pseudomonas aeruginosa	2.351
C074	2_DT	Pseudomonas aeruginosa	9.66	2_DT	Pseudomonas aeruginosa	2.329
C075	1_DT	Enterococcus faecalis	9.718	1_DT	Enterococcus faecalis	2.299
C075	2_DT	Enterococcus faecalis	9.672	2_DT	Enterococcus faecalis	2.298
C076	1_DT	Enterococcus faecalis	9.743	1_DT	Enterococcus faecalis	2.221
C076	2_DT	Enterococcus faecalis	9.721	2_DT	Enterococcus faecalis	2.329
C077	1_DT	Staphylococcus aureus	9.623	1_DT	Staphylococcus aureus	2.405
C077	2_DT	Staphylococcus aureus	9.671	2_DT	Staphylococcus aureus	2.282
C078	1_FA	Candida krusei(Issatchenkia orientalis)	9.585	1_FA	no peaks found	0
C078	2_FA	Candida krusei(Issatchenkia orientalis)	9.61	2_FA	Candida krusei	2.134
C079	1_DT	Stenotrophomonas maltophilia	9.57	1_DT	Stenotrophomonas maltophilia	2.345
C079	2_DT	Stenotrophomonas maltophilia	9.539	2_DT	Stenotrophomonas maltophilia	2.277
C080	1_DT	Enterobacter cloacae	9.612	1_DT	Enterobacter asburiae	2.232
C080	2_DT	Enterobacter cloacae	9.62	2_DT	Enterobacter asburiae	2.362
C081	1_DT	Raoultella ornithinolytica	9.7	1_DT	Raoultella ornithinolytica	2.383
C081	2_DT	Raoultella ornithinolytica	9.74	2_DT	Raoultella ornithinolytica	2.511
C082	1_DT	Staphylococcus aureus	9.575	1_DT	Staphylococcus aureus	2.264
C082	2_DT	Staphylococcus aureus	9.561	2_DT	Staphylococcus aureus	2.268
C083	1_DT	Enterobacter cloacae	9.138	1_DT	Enterobacter cloacae	1.968
C083	2_DT	Enterobacter cloacae	8.986	2_DT	Enterobacter cloacae	2.23
C084	1_DT	Streptococcus agalactiae	9.657	1_DT	Streptococcus agalactiae	2.405
C084	2_DT	Streptococcus agalactiae	9.613	2_DT	Streptococcus agalactiae	2.248
C085	1_DT	Pseudomonas aeruginosa	9.724	1_DT	Pseudomonas aeruginosa	2.323
C085	2_DT	Pseudomonas aeruginosa	9.697	2_DT	Pseudomonas aeruginosa	2.424
C086	1_DT	Escherichia coli	9.582	1_DT	Escherichia coli	2.329
C086	2_DT	Escherichia coli	9.555	2_DT	Escherichia coli	2.327
C087	1_DT	Acinetobacter baumannii	9.621	1_DT	Acinetobacter baumannii	2.279
C087	2_DT	Acinetobacter baumannii	9.663	2_DT	Acinetobacter baumannii	2.24
C088	1_DT	Klebsiella pneumoniae subsp.ozaenae	9.528	1_DT	Klebsiella pneumoniae	2.381
C088	2_DT	Klebsiella pneumoniae	9.614	2_DT	Klebsiella pneumoniae	2.402
C089	1_DT	Staphylococcus epidermidis	9.508	1_DT	Staphylococcus epidermidis	2.105
C089	2_DT	Staphylococcus epidermidis	9.344	2_DT	Staphylococcus epidermidis	2.022
C090	1_FA	Candida albicans	9.578	1_FA	Candida albicans	1.959
C090	2_FA	Candida albicans	9.522	2_FA	Candida albicans	2.061
C091	1_DT	Enterobacter aerogenes	9.582	1_DT	Enterobacter aerogenes	2.379
C091	2_DT	Enterobacter aerogenes	9.6	2_DT	Enterobacter aerogenes	2.36
C092	1_DT	Pseudomonas aeruginosa	9.697	1_DT	Pseudomonas aeruginosa	2.143
C092	2_DT	Pseudomonas aeruginosa	9.585	2_DT	Pseudomonas aeruginosa	2.228
C093	1_DT	Escherichia coli	9.642	1_DT	Escherichia coli	2.397
C093	2_DT	Escherichia coli	9.62	2_DT	Escherichia coli	2.272
C094	1_DT	Escherichia coli	9.674	1_DT	Escherichia coli	2.321
C094	2_DT	Escherichia coli	9.65	2_DT	Escherichia coli	2.329
C095	1_DT	Staphylococcus haemolyticus	9.542	1_DT	Staphylococcus haemolyticus	2.062
C095	2_DT	Staphylococcus haemolyticus	9.545	2_DT	Staphylococcus haemolyticus	1.978
C096	1_DT	Klebsiella pneumoniae	9.548	1_DT	Klebsiella pneumoniae	2.309
C096	2_DT	Klebsiella pneumoniae	9.682	2_DT	Klebsiella pneumoniae	2.219
C097	1_DT	Enterococcus faecium	9.716	1_DT	Enterococcus faecium	2.351
C097	2_DT	Enterococcus faecium	9.7	2_DT	Enterococcus faecium	2.486
C098	1_DT	Klebsiella pneumoniae	9.586	1_DT	Klebsiella pneumoniae	2.418
C098	2_DT	Klebsiella pneumoniae	9.649	2_DT	Klebsiella pneumoniae	2.349
C099	1_DT	Klebsiella pneumoniae	9.617	1_DT	Klebsiella variicola	2.249
C099	2_DT	Klebsiella pneumoniae	9.519	2_DT	Klebsiella variicola	2.404
C100	1_DT	Escherichia coli	9.618	1_DT	Escherichia coli	2.261
C100	2_DT	Escherichia coli	9.56	2_DT	Escherichia coli	2.297
C101	1_DT	Staphylococcus epidermidis	9.547	1_DT	Staphylococcus epidermidis	2.218
C101	2_DT	Staphylococcus epidermidis	9.577	2_DT	Staphylococcus epidermidis	2.239
C102	1_DT	Pseudomonas aeruginosa	9.637	1_DT	Pseudomonas aeruginosa	2.139
C102	2_DT	Pseudomonas aeruginosa	9.74	2_DT	Pseudomonas aeruginosa	2.332
C103	1_DT	Staphylococcus aureus	9.676	1_DT	Staphylococcus aureus	2.364
C103	2_DT	Staphylococcus aureus	9.579	2_DT	Staphylococcus aureus	2.42
C104	1_DT	Enterococcus faecium	9.712	1_DT	Enterococcus faecium	2.374
C104	2_DT	Enterococcus faecium	9.73	2_DT	Enterococcus faecium	2.498
C105	1_DT	Escherichia coli	9.685	1_DT	Escherichia coli	2.306
C105	2_DT	Escherichia coli	9.683	2_DT	Escherichia coli	2.399
C106	1_DT	Pseudomonas aeruginosa	9.694	1_DT	Pseudomonas aeruginosa	2.145
C106	2_DT	Pseudomonas aeruginosa	9.681	2_DT	Pseudomonas aeruginosa	2.279
C107	1_DT	Staphylococcus lugdunensis	9.641	1_DT	Staphylococcus lugdunensis	2.135
C107	2_DT	Staphylococcus lugdunensis	9.54	2_DT	Staphylococcus lugdunensis	2.167
C108	1_DT	Klebsiella oxytoca	9.632	1_DT	Klebsiella oxytoca	2.441
C108	2_DT	Klebsiella oxytoca	9.607	2_DT	Klebsiella oxytoca	2.308
C109	1_DT	Serratia marcescens	9.649	1_DT	Serratia marcescens	2.154
C109	2_DT	Serratia marcescens	9.639	2_DT	Serratia marcescens	2.262
C110	1_DT	Staphylococcus epidermidis	9.567	1_DT	Staphylococcus epidermidis	2.193
C110	2_DT	Staphylococcus epidermidis	9.529	2_DT	Staphylococcus epidermidis	2.2
C111	1_DT	Staphylococcus aureus	9.605	1_DT	Staphylococcus aureus	2.336
C111	2_DT	Staphylococcus aureus	9.692	2_DT	Staphylococcus aureus	2.282
C112	1_DT	Staphylococcus aureus	9.684	1_DT	Staphylococcus aureus	2.276
C112	2_DT	Staphylococcus aureus	9.645	2_DT	Staphylococcus aureus	2.335
C113	1_DT	Enterobacter hormaechei	9.553	1_DT	Enterobacter cloacae	2.202
C113	2_DT	Enterobacter hormaechei	9.586	2_DT	Enterobacter cloacae	2.2
C114	1_DT	Pseudomonas aeruginosa	9.699	1_DT	Pseudomonas aeruginosa	2.36
C114	2_DT	Pseudomonas aeruginosa	9.687	2_DT	Pseudomonas aeruginosa	2.34
C115	1_DT	Staphylococcus lugdunensis	9.625	1_DT	Staphylococcus lugdunensis	2.14
C115	2_DT	Staphylococcus lugdunensis	9.617	2_DT	Staphylococcus lugdunensis	2.24
C116	1_DT	Stenotrophomonas maltophilia	9.67	1_DT	Stenotrophomonas maltophilia	2.282
C116	2_DT	Stenotrophomonas maltophilia	9.654	2_DT	Stenotrophomonas maltophilia	2.262
C117	1_DT	Pseudomonas aeruginosa	9.418	1_DT	Pseudomonas aeruginosa	1.944
C117	2_DT	Pseudomonas aeruginosa	9.475	2_DT	Pseudomonas aeruginosa	2.001
C118	1_DT	Pseudomonas aeruginosa	9.705	1_DT	Pseudomonas aeruginosa	2.316
C118	2_DT	Pseudomonas aeruginosa	9.715	2_DT	Pseudomonas aeruginosa	2.312
C119	1_DT	Pseudomonas aeruginosa	9.7	1_DT	Pseudomonas aeruginosa	2.308
C119	2_DT	Pseudomonas aeruginosa	9.638	2_DT	Pseudomonas aeruginosa	2.382
C120	1_DT	Streptococcus pyogenes	9.604	1_DT	Streptococcus pyogenes	2.389
C120	2_DT	Streptococcus pyogenes	9.665	2_DT	Streptococcus pyogenes	2.427
C121	1_DT	Enterococcus faecium	9.725	1_DT	Enterococcus faecium	2.423
C121	2_DT	Enterococcus faecium	9.691	2_DT	Enterococcus faecium	2.389
C122	1_DT	Escherichia coli	9.671	1_DT	Escherichia coli	2.193
C122	2_DT	Escherichia coli	9.573	2_DT	Escherichia coli	2.129
C123	1_DT	Enterococcus faecium	4.911	1_DT	Enterococcus faecium	2.336
C123	2_DT	Enterococcus faecium	9.595	2_DT	Enterococcus faecium	2.397
C124	1_DT	Enterococcus faecium	9.597	1_DT	Enterococcus faecium	2.305
C124	2_DT	Enterococcus faecium	9.646	2_DT	Enterococcus faecium	2.436
C125	1_DT	Enterococcus faecium	9.578	1_DT	Enterococcus faecium	2.348
C125	2_DT	Enterococcus faecium	9.602	2_DT	Enterococcus faecium	2.404
C126	1_DT	Sphingomonas melonis	5.039	1_DT	Staphylococcus epidermidis	1.801
C126	2_DT	Staphylococcus epidermidis	7.556	2_DT	Staphylococcus epidermidis	2.199
C126	3_FA	Staphylococcus epidermidis	9.617	3_FA	Staphylococcus epidermidis	2.012
C127	1_DT	Enterococcus faecalis	9.627	1_DT	Enterococcus faecalis	1.865
C127	2_DT	Enterococcus faecalis	9.607	2_DT	Enterococcus faecalis	2.327
C128	1_DT	Escherichia coli	9.604	1_DT	Escherichia coli	2.383
C128	2_DT	Escherichia coli	9.567	2_DT	Escherichia coli	2.318
C129	1_DT	Enterococcus faecalis	9.332	1_DT	Enterococcus faecalis	1.86
C129	2_DT	Enterococcus faecalis	9.642	2_DT	Enterococcus faecalis	2.326
C130	1_DT	Escherichia coli	9.007	1_DT	Escherichia coli	2.226
C130	2_DT	Escherichia coli	9.541	2_DT	Escherichia coli	2.349
C131	1_DT	Citrobacter freundii	9.597	1_DT	Citrobacter freundii	2.362
C131	2_DT	Citrobacter freundii	9.559	2_DT	Citrobacter freundii	2.367
C132	1_DT	Escherichia coli	9.704	1_DT	Escherichia coli	2.341
C132	2_DT	Escherichia coli	9.643	2_DT	Escherichia coli	2.219
C133	1_DT	Enterobacter cloacae	9.584	1_DT	Enterobacter asburiae	1.996
C133	2_DT	Enterobacter asburiae	9.43	2_DT	Enterobacter asburiae	2.046
C134	1_DT	Escherichia coli	9.087	1_DT	Escherichia coli	2.073
C134	2_DT	Escherichia coli	9.607	2_DT	Escherichia coli	2.234
C135	1_DT	Escherichia coli	9.598	1_DT	Escherichia coli	2.118
C135	2_DT	Escherichia coli	9.625	2_DT	Escherichia coli	2.26
C136	1_DT	Enterococcus faecalis	9.709	1_DT	Enterococcus faecalis	2.166
C136	2_DT	Enterococcus faecalis	9.605	2_DT	Enterococcus faecalis	2.213
C137	1_DT	Enterococcus faecium	9.748	1_DT	Enterococcus faecium	2.461
C137	2_DT	Enterococcus faecium	9.711	2_DT	Enterococcus faecium	2.429
C138	1_DT	Streptococcus agalactiae	9.723	1_DT	Streptococcus agalactiae	1.982
C138	2_DT	Streptococcus agalactiae	9.7	2_DT	Streptococcus agalactiae	2.235
C139	1_DT	Enterococcus faecium	9.746	1_DT	Enterococcus faecium	2.326
C139	2_DT	Enterococcus faecium	9.758	2_DT	Enterococcus faecium	2.415
C140	1_DT	Streptococcus agalactiae	9.701	1_DT	Streptococcus agalactiae	2.093
C140	2_DT	Streptococcus agalactiae	9.669	2_DT	Streptococcus agalactiae	2.193
C141	1_DT	Staphylococcus hominis	9.191	1_DT	Staphylococcus hominis	1.88
C141	2_DT	Staphylococcus hominis	9.269	2_DT	Staphylococcus hominis	2.027
C142	1_DT	Pseudomonas aeruginosa	9.481	1_DT	Pseudomonas aeruginosa	2.131
C142	2_DT	Pseudomonas aeruginosa	9.595	2_DT	Pseudomonas aeruginosa	2.288
C143	1_DT	Staphylococcus aureus	9.552	1_DT	Staphylococcus aureus	2.152
C143	2_DT	Staphylococcus aureus	9.61	2_DT	Staphylococcus aureus	2.248
C144	1_DT	Acinetobacter nosocomialis	9.264	1_DT	Acinetobacter nosocomialis	1.807
C144	2_DT	Acinetobacter nosocomialis	9.313	2_DT	Acinetobacter baumannii	2.084
C145	1_DT	Enterococcus faecium	9.713	1_DT	Enterococcus faecium	2.429
C145	2_DT	Enterococcus faecium	9.712	2_DT	Enterococcus faecium	2.369
C146	1_DT	Enterococcus faecium	9.687	1_DT	Enterococcus faecium	2.314
C146	2_DT	Enterococcus faecium	9.676	2_DT	Enterococcus faecium	2.395
C147	1_DT	Staphylococcus aureus	9.511	1_DT	Staphylococcus aureus	2.15
C147	2_DT	Staphylococcus aureus	9.546	2_DT	no peaks found	0
C148	1_DT	Acinetobacter baumannii	9.501	1_DT	Acinetobacter baumannii	1.823
C148	2_DT	Acinetobacter baumannii	9.508	2_DT	Acinetobacter baumannii	2.166
C149	1_DT	Klebsiella pneumoniae	9.48	1_DT	Klebsiella pneumoniae	1.981
C149	2_DT	Klebsiella pneumoniae	9.629	2_DT	Klebsiella pneumoniae	2.328
C150	1_DT	Enterobacter hormaechei	9.27	1_DT	Enterobacter cloacae	1.896
C150	2_DT	Enterobacter hormaechei	9.558	2_DT	Enterobacter cloacae	2.192
C151	1_DT	Streptococcus anginosus	8.762	1_DT	Streptococcus anginosus	1.947
C151	2_DT	Streptococcus anginosus	9.513	2_DT	Streptococcus anginosus	2.077
C152	1_DT	Enterococcus faecalis	9.604	1_DT	Enterococcus faecalis	2.121
C152	2_DT	Enterococcus faecalis	9.718	2_DT	Enterococcus faecalis	2.177
C153	1_DT	Staphylococcus aureus	9.59	1_DT	Staphylococcus aureus	2.187
C153	2_DT	Staphylococcus aureus	9.601	2_DT	Staphylococcus aureus	2.011
C154	1_DT	Staphylococcus epidermidis	9.585	1_DT	Staphylococcus epidermidis	1.966
C154	2_DT	Staphylococcus epidermidis	9.562	2_DT	Staphylococcus epidermidis	1.886
C154	3_FA	Staphylococcus epidermidis	9.275	3_FA	Staphylococcus epidermidis	2.166
C155	1_DT	Staphylococcus epidermidis	9.469	1_DT	Staphylococcus epidermidis	1.99
C155	2_DT	Staphylococcus epidermidis	9.561	2_DT	Staphylococcus epidermidis	2.221
C156	1_DT	Stenotrophomonas maltophilia	9.512	1_DT	Stenotrophomonas maltophilia	2.105
C156	2_DT	Stenotrophomonas maltophilia	9.552	2_DT	Stenotrophomonas maltophilia	2.035
C157	1_DT	Escherichia coli	9.568	1_DT	Escherichia coli	2.215
C157	2_DT	Escherichia coli	9.608	2_DT	Escherichia coli	2.229
C158	1_DT	Enterococcus casseliflavus	9.515	1_DT	Enterococcus casseliflavus	1.843	Enterococcus gallinarum
C158	2_DT	Enterococcus casseliflavus	9.543	2_DT	Enterococcus casseliflavus	1.905	Enterococcus gallinarum
C159	1_DT	Enterococcus faecium	9.724	1_DT	Enterococcus faecium	2.419
C159	2_DT	Enterococcus faecium	9.725	2_DT	Enterococcus faecium	2.293
C160	1_DT	Escherichia coli	9.649	1_DT	Escherichia coli	2.231
C160	2_DT	Escherichia coli	9.659	2_DT	Escherichia coli	2.214
C161	1_DT	Enterobacter hormaechei	9.559	1_DT	Enterobacter cloacae	1.901
C161	2_DT	Enterobacter cloacae	9.589	2_DT	Enterobacter cloacae	2.091
C162	1_DT	Enterococcus faecium	9.669	1_DT	Enterococcus faecium	2.408
C162	2_DT	Enterococcus faecium	9.658	2_DT	Enterococcus faecium	2.443
C162	3_FA	Enterococcus casseliflavus	9.592	3_FA	Enterococcus casseliflavus	1.855
C163	1_DT	Klebsiella pneumoniae	9.62	1_DT	Klebsiella pneumoniae	2.312
C163	2_DT	Klebsiella pneumoniae	9.585	2_DT	Klebsiella pneumoniae	2.358
C164	1_DT	Pseudomonas aeruginosa	9.598	1_DT	Pseudomonas aeruginosa	2.302
C164	2_DT	Pseudomonas aeruginosa	9.603	2_DT	Pseudomonas aeruginosa	2.296
C165	1_DT	Klebsiella pneumoniae	9.602	1_DT	Klebsiella pneumoniae	2.358
C165	2_DT	Klebsiella pneumoniae	9.654	2_DT	Klebsiella pneumoniae	2.315
C166	1_DT	Klebsiella pneumoniae subsp.pneumoniae	9.524	1_DT	no reliable identification	1.66
C166	2_DT	Klebsiella quasipneumoniae	9.542	2_DT	Klebsiella variicola	1.785
C166	3_FA	Klebsiella quasipneumoniae	9.426	3_FA	Klebsiella pneumoniae	2.01
C167	1_DT	Klebsiella pneumoniae	9.631	1_DT	Klebsiella variicola	1.883
C167	2_DT	Klebsiella pneumoniae subsp.pneumoniae	9.548	2_DT	Klebsiella pneumoniae	2.207
C168	1_DT	Staphylococcus aureus	9.54	1_DT	Staphylococcus aureus	2.271
C168	2_DT	Staphylococcus aureus	9.576	2_DT	Staphylococcus aureus	2.187
C169	1_DT	Enterobacter aerogenes	9.322	1_DT	Enterobacter aerogenes	2.05
C169	2_DT	Enterobacter aerogenes	9.282	2_DT	Enterobacter aerogenes	2.202
C170	1_DT	Staphylococcus epidermidis	9.405	1_DT	Staphylococcus epidermidis	1.995
C170	2_DT	Staphylococcus epidermidis	9.558	2_DT	Staphylococcus epidermidis	2.003
C171	1_DT	Enterobacter aerogenes	9.356	1_DT	Enterobacter aerogenes	2.141
C171	2_DT	Enterobacter aerogenes	9.245	2_DT	Enterobacter aerogenes	2.284
C172	1_DT	Escherichia coli	9.543	1_DT	Escherichia coli	2.236
C172	2_DT	Escherichia coli	9.567	2_DT	Escherichia coli	2.137
C173	1_DT	Klebsiella pneumoniae	9.545	1_DT	Klebsiella pneumoniae	2.318
C173	2_DT	Klebsiella quasipneumoniae	9.528	2_DT	Klebsiella pneumoniae	2.255
C174	1_DT	Enterobacter aerogenes	9.026	1_DT	Enterobacter aerogenes	2.195
C174	2_DT	Enterobacter aerogenes	9.024	2_DT	Enterobacter aerogenes	2.19
C175	1_DT	Pseudomonas aeruginosa	9.595	1_DT	Pseudomonas aeruginosa	2.325
C175	2_DT	Pseudomonas aeruginosa	9.535	2_DT	Pseudomonas aeruginosa	2.181
C176	1_DT	Pseudomonas aeruginosa	9.349	1_DT	Pseudomonas aeruginosa	2.263
C176	2_DT	Pseudomonas aeruginosa	9.593	2_DT	Pseudomonas aeruginosa	2.298
C177	1_DT	Klebsiella pneumoniae	9.539	1_DT	Klebsiella pneumoniae	2.03
C177	2_DT	Klebsiella pneumoniae subsp.pneumoniae	9.372	2_DT	no peaks found	0
C178	1_DT	Staphylococcus aureus	9.594	1_DT	Staphylococcus aureus	2.17
C178	2_DT	Staphylococcus aureus	9.608	2_DT	Staphylococcus aureus	2.239
C179	1_DT	Klebsiella quasipneumoniae	9.292	1_DT	Klebsiella pneumoniae	2.018
C179	2_DT	Klebsiella quasipneumoniae	9.334	2_DT	Klebsiella pneumoniae	2.095
C180	1_DT	Raoultella ornithinolytica	9.029	1_DT	Klebsiella oxytoca	2.173	Klebsiella oxytoca
C180	2_DT	Raoultella ornithinolytica	9.159	2_DT	no peaks found	0	Klebsiella oxytoca
C181	1_DT	Staphylococcus aureus	9.554	1_DT	Staphylococcus aureus	2.097
C181	2_DT	Staphylococcus aureus	9.604	2_DT	Staphylococcus aureus	2.113
C182	1_DT	Staphylococcus aureus	9.55	1_DT	Staphylococcus aureus	2.185
C182	2_DT	Staphylococcus aureus	9.598	2_DT	Staphylococcus aureus	2.113
C183	1_DT	Raoultella ornithinolytica	9.547	1_DT	Raoultella ornithinolytica	2.117
C183	2_DT	Raoultella ornithinolytica	9.337	2_DT	Raoultella ornithinolytica	2.153
C184	1_DT	Klebsiella pneumoniae	9.086	1_DT	Klebsiella pneumoniae	1.806
C184	2_DT	Klebsiella pneumoniae	9.417	2_DT	Klebsiella pneumoniae	2.185
C185	1_DT	Staphylococcus aureus	9.552	1_DT	Staphylococcus aureus	2.062
C185	2_DT	Staphylococcus aureus	9.484	2_DT	Staphylococcus aureus	2.003
C186	1_DT	Enterococcus faecalis	9.671	1_DT	Enterococcus faecalis	2.243
C186	2_DT	Enterococcus faecalis	9.659	2_DT	Enterococcus faecalis	2.254
C187	1_DT	Staphylococcus capitis	9.208	1_DT	Staphylococcus capitis	1.945
C187	2_DT	Staphylococcus capitis	9.302	2_DT	Staphylococcus capitis	2.083
C188	1_DT	Staphylococcus epidermidis	9.553	1_DT	Staphylococcus epidermidis	1.782
C188	2_DT	Staphylococcus epidermidis	9.448	2_DT	Staphylococcus epidermidis	1.861
C188	3_FA	Staphylococcus epidermidis	9.518	3_FA	Staphylococcus epidermidis	2.023
C189	1_DT	Staphylococcus epidermidis	9.525	1_DT	Staphylococcus epidermidis	1.826
C189	2_DT	Staphylococcus epidermidis	9.538	2_DT	Staphylococcus epidermidis	2.06
C190	1_DT	Enterococcus faecium	9.519	1_DT	Enterococcus faecium	1.947
C190	2_DT	Enterococcus faecium	9.601	2_DT	Enterococcus faecium	2.347
C191	1_DT	Staphylococcus epidermidis	9.088	1_DT	Staphylococcus epidermidis	1.931
C191	2_DT	Staphylococcus epidermidis	9.503	2_DT	Staphylococcus epidermidis	1.959
C191	3_FA	Staphylococcus epidermidis	9.531	3_FA	Staphylococcus epidermidis	2.083
C192	1_DT	Enterococcus faecium	9.657	1_DT	Enterococcus faecium	2.191
C192	2_DT	Enterococcus faecium	9.614	2_DT	Enterococcus faecium	2.444
C193	1_DT	Staphylococcus epidermidis	9.404	1_DT	Staphylococcus epidermidis	1.858	Staphylococcus epidermidis
C193	2_DT	Staphylococcus epidermidis	9.365	2_DT	Staphylococcus epidermidis	1.976	Staphylococcus epidermidis
C193	3_FA	Staphylococcus epidermidis	9.508	3_FA	Staphylococcus epidermidis	1.982	Staphylococcus epidermidis
C194	1_DT	Staphylococcus epidermidis	9.212	1_DT	Staphylococcus epidermidis	1.859
C194	2_DT	Staphylococcus epidermidis	9.433	2_DT	Staphylococcus epidermidis	2.11
C195	1_DT	Staphylococcus aureus	9.549	1_DT	Staphylococcus aureus	2.12
C195	2_DT	Staphylococcus aureus	9.504	2_DT	Staphylococcus aureus	2.043
C196	1_DT	Enterococcus avium	9.626	1_DT	Enterococcus avium	2.053
C196	2_DT	Enterococcus avium	9.587	2_DT	Enterococcus avium	2.072
C197	1_DT	Enterococcus faecalis	9.317	1_DT	Enterococcus faecalis	1.866
C197	2_DT	Enterococcus faecalis	9.517	2_DT	Enterococcus faecalis	2.198
C198	1_DT	Escherichia coli	9.535	1_DT	Escherichia coli	2.283
C198	2_DT	Escherichia coli	9.617	2_DT	Escherichia coli	2.217
C199	1_DT	Escherichia coli	9.517	1_DT	Escherichia coli	2.137
C199	2_DT	Escherichia coli	9.529	2_DT	Escherichia coli	2.097
C200	1_DT	Escherichia coli	9.572	1_DT	Escherichia coli	2.183
C200	2_DT	Escherichia coli	9.61	2_DT	Escherichia coli	2.273
C201	1_DT	Enterobacter hormaechei	9.351	1_DT	Enterobacter cloacae	2.366
C201	2_DT	Enterobacter cloacae	9.31	2_DT	Enterobacter cloacae	2.307
C202	1_DT	Escherichia coli	9.517	1_DT	Escherichia coli	2.324
C202	2_DT	Escherichia coli	9.513	2_DT	Escherichia coli	2.273
C203	1_DT	Escherichia coli	9.544	1_DT	Escherichia coli	2.331
C203	2_DT	Escherichia coli	9.552	2_DT	Escherichia coli	2.194
C204	1_DT	Escherichia coli	9.588	1_DT	Escherichia coli	2.365
C204	2_DT	Escherichia coli	9.61	2_DT	Escherichia coli	2.231
C205	1_DT	Enterobacter cloacae	9.222	1_DT	Enterobacter cloacae	2.097
C205	2_DT	Enterobacter cloacae	9.446	2_DT	no peaks found	0
C206	1_DT	Morganella morganii	9.787	1_DT	Morganella morganii	2.267
C206	2_DT	Morganella morganii	9.697	2_DT	Morganella morganii	2.21
C207	1_DT	Klebsiella pneumoniae	9.629	1_DT	Klebsiella pneumoniae	2.365
C207	2_DT	Klebsiella pneumoniae	9.546	2_DT	no peaks found	0
C208	1_DT	Escherichia coli	9.575	1_DT	Escherichia coli	2.227
C208	2_DT	Escherichia coli	9.581	2_DT	Escherichia coli	2.236
C209	1_DT	Escherichia coli	9.507	1_DT	Escherichia coli	2.003
C209	2_DT	Escherichia coli	9.536	2_DT	no peaks found	0
C210	1_DT	Proteus mirabilis	9.565	1_DT	Proteus mirabilis	2.186
C210	2_DT	Proteus mirabilis	9.674	2_DT	no peaks found	0
C211	1_DT	Escherichia coli	9.513	1_DT	Escherichia coli	2.25
C211	2_DT	Escherichia coli	9.43	2_DT	Escherichia coli	2.293
C212	1_DT	Enterobacter aerogenes	9.608	1_DT	Enterobacter aerogenes	2.309
C212	2_DT	Enterobacter aerogenes	9.607	2_DT	Enterobacter aerogenes	2.284
C213	1_DT	Streptococcus agalactiae	9.697	1_DT	Streptococcus agalactiae	2.115
C213	2_DT	Streptococcus agalactiae	9.608	2_DT	Streptococcus agalactiae	2.144
C214	1_DT	Enterococcus faecium	9.643	1_DT	Enterococcus faecium	2.377
C214	2_DT	Enterococcus faecium	9.652	2_DT	Enterococcus faecium	2.402
C215	1_DT	Streptococcus agalactiae	9.725	1_DT	Streptococcus agalactiae	2.175
C215	2_DT	Streptococcus agalactiae	9.715	2_DT	Streptococcus agalactiae	2.193
C216	1_DT	Streptococcus agalactiae	9.649	1_DT	Streptococcus agalactiae	2.2
C216	2_DT	Streptococcus agalactiae	9.678	2_DT	Streptococcus agalactiae	2.227
C217	1_DT	Enterococcus faecium	9.595	1_DT	Enterococcus faecium	2.327
C217	2_DT	Enterococcus faecium	9.59	2_DT	Enterococcus faecium	2.384
C218	1_DT	Enterococcus faecium	9.64	1_DT	Enterococcus faecium	2.427
C218	2_DT	Enterococcus faecium	9.556	2_DT	Enterococcus faecium	2.343
C219	1_DT	Enterococcus faecium	9.688	1_DT	Enterococcus faecium	2.327
C219	2_DT	Enterococcus faecium	9.681	2_DT	Enterococcus faecium	2.422
C220	1_DT	Enterococcus faecium	9.705	1_DT	Enterococcus faecium	2.337
C220	2_DT	Enterococcus faecium	9.66	2_DT	Enterococcus faecium	2.31
C221	1_DT	Enterococcus faecium	9.663	1_DT	Enterococcus faecium	2.431
C221	2_DT	Enterococcus faecium	9.633	2_DT	Enterococcus faecium	2.401
C222	1_DT	Stenotrophomonas maltophilia	9.49	1_DT	Stenotrophomonas maltophilia	2.123
C222	2_DT	Stenotrophomonas maltophilia	9.492	2_DT	Stenotrophomonas maltophilia	2.123
C223	1_DT	Enterococcus faecium	9.63	1_DT	Enterococcus faecium	2.409
C223	2_DT	Enterococcus faecium	9.673	2_DT	Enterococcus faecium	2.411
C224	1_DT	Enterococcus faecium	9.7	1_DT	Enterococcus faecium	2.52
C224	2_DT	Enterococcus faecium	9.671	2_DT	Enterococcus faecium	2.445
C225	1_DT	Staphylococcus aureus	9.541	1_DT	Staphylococcus aureus	2.21
C225	2_DT	Staphylococcus aureus	9.379	2_DT	Staphylococcus aureus	2.125
C226	1_DT	Enterococcus faecalis	9.681	1_DT	Enterococcus faecalis	2.163
C226	2_DT	Enterococcus faecalis	9.642	2_DT	Enterococcus faecalis	2.046
C227	1_DT	Pseudomonas aeruginosa	9.611	1_DT	Pseudomonas aeruginosa	2.259
C227	2_DT	Pseudomonas aeruginosa	9.605	2_DT	Pseudomonas aeruginosa	2.084
C228	1_DT	Escherichia coli	9.593	1_DT	Escherichia coli	2.124
C228	2_DT	Escherichia coli	9.549	2_DT	Escherichia coli	2.207
C229	1_DT	Klebsiella pneumoniae	9.562	1_DT	Klebsiella pneumoniae	2.283
C229	2_DT	Klebsiella pneumoniae	9.316	2_DT	Klebsiella pneumoniae	2.153
C230	1_DT	Staphylococcus lugdunensis	9.596	1_DT	Staphylococcus lugdunensis	2.03
C230	2_DT	Staphylococcus lugdunensis	9.643	2_DT	Staphylococcus lugdunensis	2.185
C231	1_DT	Enterococcus faecium	9.677	1_DT	Enterococcus faecium	2.398
C231	2_DT	Enterococcus faecium	9.669	2_DT	Enterococcus faecium	2.368
C232	1_DT	Stenotrophomonas maltophilia	9.619	1_DT	Stenotrophomonas maltophilia	2.129
C232	2_DT	Stenotrophomonas maltophilia	9.648	2_DT	Stenotrophomonas maltophilia	2.039
C233	1_DT	Enterococcus faecium	9.668	1_DT	Enterococcus faecium	2.384
C233	2_DT	Enterococcus faecium	9.647	2_DT	Enterococcus faecium	2.384
C234	1_DT	Escherichia coli	9.628	1_DT	no peaks found	0
C234	2_DT	Escherichia coli	9.583	2_DT	Escherichia coli	2.186
C235	1_DT	Klebsiella pneumoniae	9.506	1_DT	Klebsiella variicola	2.043
C235	2_DT	Klebsiella pneumoniae	9.517	2_DT	no peaks found	0
C236	1_DT	Escherichia coli	9.634	1_DT	Escherichia coli	2.126
C236	2_DT	Escherichia coli	9.572	2_DT	Escherichia coli	2.251
C237	1_DT	Serratia marcescens	9.55	1_DT	Serratia marcescens	2.338
C237	2_DT	Serratia marcescens	9.42	2_DT	Serratia marcescens	2.328
C238	1_DT	Escherichia coli	9.548	1_DT	no peaks found	0
C238	2_DT	Escherichia coli	9.672	2_DT	Escherichia coli	2.171
C239	1_DT	Escherichia coli	9.62	1_DT	Escherichia coli	2.283
C239	2_DT	Escherichia coli	9.577	2_DT	Escherichia coli	2.331
C240	1_DT	Pseudomonas aeruginosa	9.671	1_DT	Pseudomonas aeruginosa	2.169
C240	2_DT	Pseudomonas aeruginosa	9.691	2_DT	Pseudomonas aeruginosa	2.133
C241	1_DT	Klebsiella pneumoniae subsp.pneumoniae	9.515	1_DT	Klebsiella pneumoniae	2.11
C241	2_DT	Klebsiella pneumoniae subsp.pneumoniae	9.518	2_DT	Klebsiella pneumoniae	1.787
C242	1_DT	Escherichia coli	9.613	1_DT	Escherichia coli	2.152
C242	2_DT	Escherichia coli	9.576	2_DT	no peaks found	0
C243	1_DT	Escherichia coli	9.58	1_DT	Escherichia coli	2.251
C243	2_DT	Escherichia coli	9.557	2_DT	Escherichia coli	2.225
C244	1_DT	Klebsiella pneumoniae	9.615	1_DT	no peaks found	0
C244	2_DT	Klebsiella pneumoniae	9.4	2_DT	Klebsiella pneumoniae	2.264
C245	1_DT	Escherichia coli	9.56	1_DT	Escherichia coli	2.272
C245	2_DT	Escherichia coli	9.576	2_DT	Escherichia coli	2.093
C246	1_DT	Escherichia coli	9.591	1_DT	Escherichia coli	2.128
C246	2_DT	Escherichia coli	9.566	2_DT	Escherichia coli	2.234
C247	1_DT	Escherichia coli	9.7	1_DT	Escherichia coli	2.293
C247	2_DT	Escherichia coli	9.716	2_DT	Escherichia coli	2.312
C248	1_DT	Escherichia coli	9.631	1_DT	Escherichia coli	2.159
C248	2_DT	Escherichia coli	9.56	2_DT	Escherichia coli	2.139
C249	1_DT	Streptococcus agalactiae	9.63	1_DT	Streptococcus agalactiae	1.894
C249	2_DT	Streptococcus agalactiae	9.597	2_DT	Streptococcus agalactiae	1.915
C249	3_FA	Streptococcus agalactiae	9.649	3_FA	Streptococcus agalactiae	2.203
C250	1_DT	Citrobacter braakii	9.685	1_DT	Citrobacter braakii	2.025
C250	2_DT	Citrobacter braakii	9.568	2_DT	Citrobacter braakii	2.105
C251	1_DT	Escherichia coli	9.562	1_DT	Escherichia coli	2.229
C251	2_DT	Escherichia coli	9.558	2_DT	Escherichia coli	2.341
C252	1_DT	Escherichia coli	9.636	1_DT	Escherichia coli	2.111
C252	2_DT	Escherichia coli	9.633	2_DT	Escherichia coli	2.302
C253	1_DT	Escherichia coli	9.754	1_DT	Escherichia coli	2.217
C253	2_DT	Escherichia coli	9.74	2_DT	Escherichia coli	2.207
C254	1_DT	Streptococcus agalactiae	9.62	1_DT	Streptococcus agalactiae	2.232
C254	2_DT	Streptococcus agalactiae	9.663	2_DT	no peaks found	0
C255	1_DT	Klebsiella pneumoniae	9.595	1_DT	Klebsiella pneumoniae	2.297
C255	2_DT	Klebsiella pneumoniae subsp.pneumoniae	9.436	2_DT	no peaks found	0
C256	1_DT	Klebsiella pneumoniae subsp.pneumoniae	9.472	1_DT	no peaks found	0
C256	2_DT	Klebsiella pneumoniae subsp.pneumoniae	9.359	2_DT	Klebsiella pneumoniae	2.134
C257	1_DT	Enterobacter cloacae	9.266	1_DT	Enterobacter cloacae	2.226
C257	2_DT	Enterobacter cloacae	9.272	2_DT	Enterobacter cloacae	2.032
C258	1_DT	Proteus mirabilis	9.648	1_DT	Proteus mirabilis	2.168
C258	2_DT	Proteus mirabilis	9.579	2_DT	Proteus mirabilis	2.377
C259	1_DT	Pseudomonas aeruginosa	9.581	1_DT	Pseudomonas aeruginosa	2.008
C259	2_DT	Pseudomonas aeruginosa	9.535	2_DT	Pseudomonas aeruginosa	1.945
C260	1_DT	Enterococcus faecium	9.547	1_DT	Enterococcus faecium	2.205
C260	2_DT	Enterococcus faecium	9.601	2_DT	no peaks found	0
C261	1_DT	Acinetobacter baumannii	9.554	1_DT	Acinetobacter baumannii	2.254
C261	2_DT	Acinetobacter baumannii	9.573	2_DT	Acinetobacter baumannii	2.131
C262	1_DT	Escherichia coli	9.531	1_DT	Escherichia coli	2.167
C262	2_DT	Escherichia coli	9.571	2_DT	Escherichia coli	2.137
C263	1_DT	Escherichia coli	9.498	1_DT	Escherichia coli	2.365
C263	2_DT	Escherichia coli	9.384	2_DT	no peaks found	0
C264	1_DT	Escherichia coli	9.26	1_DT	Escherichia coli	1.861
C264	2_DT	Escherichia coli	9.511	2_DT	Escherichia coli	1.971
C264	3_FA	Escherichia coli	9.565	3_FA	Escherichia coli	2.318
C265	1_DT	Enterobacter cloacae	9.298	1_DT	Enterobacter cloacae	2.149
C265	2_DT	Enterobacter cloacae	9.343	2_DT	Enterobacter cloacae	2.077
C266	1_DT	Klebsiella pneumoniae	9.672	1_DT	Klebsiella pneumoniae	2.252
C266	2_DT	Klebsiella pneumoniae	9.655	2_DT	Klebsiella pneumoniae	2.247
C267	1_DT	Enterococcus faecium	9.642	1_DT	no peaks found	0
C267	2_DT	Enterococcus faecium	9.605	2_DT	Enterococcus faecium	2.294
C268	1_DT	Enterococcus faecium	9.577	1_DT	Enterococcus faecium	2.239
C268	2_DT	Enterococcus faecium	9.672	2_DT	Enterococcus faecium	2.217
C269	1_DT	Escherichia coli	9.596	1_DT	Escherichia coli	2.088
C269	2_DT	Escherichia coli	9.571	2_DT	no peaks found	0
C270	1_DT	Escherichia coli	9.615	1_DT	Escherichia coli	2.166
C270	2_DT	Escherichia coli	9.59	2_DT	Escherichia coli	2.235
C271	1_DT	Escherichia coli	9.093	1_DT	Escherichia coli	2.086
C271	2_DT	Escherichia coli	9.457	2_DT	Escherichia coli	2.079
C272	1_DT	Enterococcus faecium	9.708	1_DT	Enterococcus faecium	2.389
C272	2_DT	Enterococcus faecium	9.723	2_DT	Enterococcus faecium	2.375
C273	1_DT	Escherichia coli	9.673	1_DT	Escherichia coli	2.332
C273	2_DT	Escherichia coli	9.644	2_DT	Escherichia coli	2.256
C274	1_DT	Escherichia coli	9.672	1_DT	Escherichia coli	2.244
C274	2_DT	Escherichia coli	9.556	2_DT	Escherichia coli	2.23
C275	1_DT	Escherichia coli	7.149	1_DT	Escherichia coli	2.274
C275	2_DT	Escherichia coli	9.352	2_DT	Escherichia coli	2.223
C276	1_DT	Escherichia coli	9.542	1_DT	Escherichia coli	2.279
C276	2_DT	Escherichia coli	9.555	2_DT	Escherichia coli	2.085
C277	1_DT	Staphylococcus caprae	9.466	1_DT	no peaks found	0
C277	2_DT	Staphylococcus caprae	9.509	2_DT	Staphylococcus caprae	2.02
C278	1_DT	Enterobacter asburiae	9.547	1_DT	Enterobacter asburiae	2.219
C278	2_DT	Enterobacter asburiae	9.496	2_DT	Enterobacter asburiae	2.195
C279	1_DT	Pseudomonas aeruginosa	9.664	1_DT	Pseudomonas aeruginosa	2.167
C279	2_DT	Pseudomonas aeruginosa	9.625	2_DT	Pseudomonas aeruginosa	2.226
C280	1_DT	Klebsiella pneumoniae	9.72	1_DT	Klebsiella pneumoniae	2.369
C280	2_DT	Klebsiella pneumoniae	9.522	2_DT	Klebsiella pneumoniae	2.306
C281	1_DT	Citrobacter freundii	9.577	1_DT	Citrobacter freundii	2.247
C281	2_DT	Citrobacter freundii	9.588	2_DT	Citrobacter freundii	2.28
C282	1_DT	Citrobacter freundii	9.617	1_DT	Citrobacter freundii	2.308
C282	2_DT	Citrobacter freundii	9.216	2_DT	Citrobacter freundii	2.301
C283	1_DT	Pseudomonas aeruginosa	9.707	1_DT	Pseudomonas aeruginosa	2.209
C283	2_DT	Pseudomonas aeruginosa	9.69	2_DT	Pseudomonas aeruginosa	1.814
C284	1_DT	Enterobacter aerogenes	9.608	1_DT	Enterobacter aerogenes	2.287
C284	2_DT	Enterobacter aerogenes	9.538	2_DT	Enterobacter aerogenes	2.195
C285	1_DT	Acinetobacter baumannii	9.651	1_DT	Acinetobacter baumannii	2.203
C285	2_DT	Acinetobacter baumannii	9.619	2_DT	Acinetobacter baumannii	2.319
C286	1_FA	Candida krusei(Issatchenkia orientalis)	8.548	1_FA	Candida krusei	1.801
C286	2_FA	Candida krusei(Issatchenkia orientalis)	9.239	2_FA	Candida krusei	1.796
C286	3_EtOH/FA	Candida krusei(Issatchenkia orientalis)	9.742	3_EtOH/FA	Candida krusei	2.155
C287	1_DT	Staphylococcus capitis	9.562	1_DT	Staphylococcus capitis	2.047
C287	2_DT	Staphylococcus capitis	9.601	2_DT	Staphylococcus capitis	2.057
C288	1_DT	Enterobacter aerogenes	9.631	1_DT	Enterobacter aerogenes	2.287
C288	2_DT	Enterobacter aerogenes	9.63	2_DT	Enterobacter aerogenes	2.189
C289	1_DT	Pseudomonas aeruginosa	9.583	1_DT	Pseudomonas aeruginosa	2.316
C289	2_DT	Pseudomonas aeruginosa	9.539	2_DT	Pseudomonas aeruginosa	2.318
C290	1_DT	Acinetobacter baumannii	9.576	1_DT	Acinetobacter baumannii	2.331
C290	2_DT	Acinetobacter baumannii	9.554	2_DT	Acinetobacter baumannii	2.297
C291	1_DT	Staphylococcus aureus	9.575	1_DT	Staphylococcus aureus	2.182
C291	2_DT	Staphylococcus aureus	9.652	2_DT	Staphylococcus aureus	2.218
C292	1_DT	Enterobacter aerogenes	9.594	1_DT	Enterobacter aerogenes	2.235
C292	2_DT	Enterobacter aerogenes	9.512	2_DT	Enterobacter aerogenes	2.231
C293	1_DT	Acinetobacter baumannii	9.62	1_DT	Acinetobacter baumannii	2.16
C293	2_DT	Acinetobacter baumannii	9.584	2_DT	Acinetobacter baumannii	2.249
C294	1_DT	Escherichia coli	9.597	1_DT	Escherichia coli	2.267
C294	2_DT	Escherichia coli	9.65	2_DT	Escherichia coli	2.297
C295	1_DT	Staphylococcus aureus	9.659	1_DT	Staphylococcus aureus	1.965
C295	2_DT	Staphylococcus aureus	9.635	2_DT	Staphylococcus aureus	2.197
C296	1_DT	Escherichia coli	9.696	1_DT	Escherichia coli	2.215
C296	2_DT	Escherichia coli	9.684	2_DT	Escherichia coli	2.247
C297	1_DT	Pseudomonas aeruginosa	9.71	1_DT	Pseudomonas aeruginosa	2.188
C297	2_DT	Pseudomonas aeruginosa	9.664	2_DT	Pseudomonas aeruginosa	2.156
C298	1_DT	Staphylococcus aureus	9.61	1_DT	Staphylococcus aureus	2.086
C298	2_DT	Staphylococcus aureus	9.609	2_DT	Staphylococcus aureus	2.146
C299	1_DT	Staphylococcus hominis	9.595	1_DT	Staphylococcus hominis	2.122
C299	2_DT	Staphylococcus hominis	9.563	2_DT	Staphylococcus hominis	2.186
C300	1_FA	Candida albicans	9.518	1_FA	Candida albicans	1.865
C300	2_FA	Candida albicans	9.251	2_FA	Candida albicans	1.885
C300	3_EtOH/FA	Candida albicans	9.519	3_EtOH/FA	Candida albicans	2.043
C301	1_FA	Candida albicans	9.36	1_FA	Candida albicans	1.865
C301	2_FA	Candida albicans	9.526	2_FA	no reliable identification	1.66
C301	3_EtOH/FA	Candida albicans	9.604	3_EtOH/FA	Candida albicans	2.009
C302	1_DT	Staphylococcus hominis	9.53	1_DT	Staphylococcus hominis	2.202
C302	2_DT	Staphylococcus hominis	9.606	2_DT	Staphylococcus hominis	2.122

## Sheet: preserved
SpecimenNo	TestOrder_Autof	Result_Autof	Range_Autof	TestOrder_Bruker	Result_Bruker	Score_Bruker	Reference_16S/ITS
P001	1_DT	Propionibacterium acnes	6.988	1_DT	Propionibacterium acnes	2.007
P001	2_DT	Propionibacterium acnes	9.432	2_DT	Propionibacterium acnes	1.95
P002	1_DT	Prevotella melaninogenica	7.896	1_DT	Prevotella melaninogenica	2.117
P002	2_DT	Prevotella melaninogenica	9.241	2_DT	Prevotella melaninogenica	2.072
P003	1_DT	Burkholderia multivorans	9.367	1_DT	Burkholderia multivorans	2.1
P003	2_DT	Burkholderia multivorans	9.523	2_DT	Burkholderia multivorans	2.242
P004	1_FA	Candida albicans	5.731	1_FA	Candida dubliniensis	2.089	Candida dubliniensis
P004	2_FA	Candida albicans	6.014	2_FA	Candida dubliniensis	2.074	Candida dubliniensis
P004	3_EtOH/FA	Candida dubliniensis	9.419	3_EtOH/FA	Candida dubliniensis	1.725	Candida dubliniensis
P005	1_DT	Aerococcus viridans	9.579	1_DT	Aerococcus viridans	2.057
P005	2_DT	Aerococcus viridans	9.641	2_DT	Aerococcus viridans	2.083
P006	1_DT	Streptococcus pyogenes	9.674	1_DT	Streptococcus pyogenes	2.217
P006	2_DT	Streptococcus pyogenes	9.64	2_DT	Streptococcus pyogenes	2.146
P007	1_DT	Klebsiella oxytoca	9.634	1_DT	Klebsiella oxytoca	2.225
P007	2_DT	Klebsiella oxytoca	9.519	2_DT	Klebsiella oxytoca	2.256
P008	1_DT	Streptococcus sp.	6.449	1_DT	no peaks found	0	Streptococcus pneumoniae
P008	2_DT	Streptococcus pneumoniae	9.154	2_DT	no peaks found	0	Streptococcus pneumoniae
P008	3_FA	Streptococcus pneumoniae	9.4	3_FA	Streptococcus pneumoniae	1.924	Streptococcus pneumoniae
P009	1_DT	Klebsiella oxytoca	9.575	1_DT	Klebsiella oxytoca	2.289
P009	2_DT	Klebsiella oxytoca	9.502	2_DT	Klebsiella oxytoca	2.278
P010	1_DT	Enterobacter kobei	9.352	1_DT	Enterobacter asburiae	2.28
P010	2_DT	Enterobacter asburiae	9.4	2_DT	Enterobacter kobei	2.347
P011	1_DT	Serratia liquefaciens	9.615	1_DT	Serratia liquefaciens	2.243
P011	2_DT	Serratia liquefaciens	9.597	2_DT	Serratia liquefaciens	2.333
P012	1_DT	Yersinia enterocolitica	9.751	1_DT	Yersinia enterocolitica	2.328
P012	2_DT	Yersinia enterocolitica	9.699	2_DT	Yersinia enterocolitica	2.515
P013	1_DT	Streptococcus sp.	5.48	1_DT	Streptococcus constellatus	2.102
P013	2_DT	Streptococcus constellatus	9.471	2_DT	Streptococcus constellatus	2.043
P014	1_DT	Streptococcus dysgalactiae	9.058	1_DT	Streptococcus dysgalactiae	2.311
P014	2_DT	Streptococcus dysgalactiae	9.009	2_DT	Streptococcus dysgalactiae	2.182
P015	1_DT	Fusobacterium nucleatum	8.743	1_DT	Fusobacterium nucleatum	2.264
P015	2_DT	Fusobacterium nucleatum	9.182	2_DT	Fusobacterium nucleatum	2.089
P016	1_DT	Salmonella sp.	9.731	1_DT	Salmonella sp	2.284
P016	2_DT	Salmonella sp.	9.618	2_DT	Salmonella sp	2.206
P017	1_DT	Streptococcus oralis	7.831	1_DT	Streptococcus oralis	2.355
P017	2_DT	Streptococcus oralis	9.539	2_DT	Streptococcus oralis	2.118
P018	1_DT	Staphylococcus aureus	9.571	1_DT	Staphylococcus aureus	2.09
P018	2_DT	Staphylococcus aureus	9.303	2_DT	Staphylococcus aureus	2.051
P019	1_DT	Campylobacter jejuni	8.422	1_DT	Campylobacter jejuni	1.85
P019	2_DT	Campylobacter jejuni	9.479	2_DT	Campylobacter jejuni	2.142
P020	1_DT	Pantoea agglomerans	9.049	1_DT	Pantoea agglomerans	2.131
P020	2_DT	Pantoea agglomerans	9.5	2_DT	Pantoea agglomerans	2.07
P021	1_DT	Streptococcus constellatus	9.569	1_DT	Streptococcus constellatus	2.077
P021	2_DT	Streptococcus constellatus	9.597	2_DT	Streptococcus constellatus	1.998
P022	1_DT	Staphylococcus aureus	9.457	1_DT	Staphylococcus aureus	2.187
P022	2_DT	Staphylococcus aureus	9.643	2_DT	Staphylococcus aureus	2.372
P023	1_DT	Bacteroides ovatus	9.618	1_DT	Bacteroides ovatus	2.199
P023	2_DT	Bacteroides ovatus	9.666	2_DT	Bacteroides ovatus	1.93
P024	1_DT	Staphylococcus saprophyticus	9.498	1_DT	Staphylococcus saprophyticus	2.131
P024	2_DT	Staphylococcus saprophyticus	9.283	2_DT	Staphylococcus saprophyticus	2.072
P025	1_DT	Staphylococcus pasteuri	7.254	1_DT	Staphylococcus pasteuri	1.949
P025	2_DT	Staphylococcus pasteuri	9.318	2_DT	Staphylococcus pasteuri	2.029
P026	1_DT	Proteus vulgaris	9.552	1_DT	Proteus vulgaris	2.319
P026	2_DT	Proteus vulgaris	9.6	2_DT	Proteus vulgaris	2.389
P027	1_FA	Monascus pilosus	4.546	1_FA	Candida krusei	2.018
P027	2_FA	Enterobacter cloacae	4.237	2_FA	Candida krusei	2.264
P028	1_DT	Providencia rettgeri	9.531	1_DT	Providencia rettgeri	2.339
P028	2_DT	Providencia rettgeri	9.733	2_DT	Providencia rettgeri	2.364
P029	1_DT	Citrobacter koseri	9.692	1_DT	Citrobacter koseri	2.106
P029	2_DT	Citrobacter koseri	9.598	2_DT	Citrobacter koseri	2.177
P030	1_DT	Listeria monocytogenes	9.522	1_DT	no reliable identification	1.687
P030	2_DT	Listeria monocytogenes	9.364	2_DT	Listeria monocytogenes	2.098
P031	1_FA	Candida krusei(Issatchenkia orientalis)	4.438	1_FA	Candida krusei	1.999
P031	2_FA	Candida krusei(Issatchenkia orientalis)	5.791	2_FA	Candida krusei	2.083
P032	1_DT	Staphylococcus saprophyticus	8.243	1_DT	Staphylococcus saprophyticus	2.152
P032	2_DT	Staphylococcus saprophyticus	5.45	2_DT	Staphylococcus saprophyticus	2.06
P032	3_FA	Staphylococcus saprophyticus	9.308	3_FA	Staphylococcus saprophyticus	2.096
P033	1_DT	Streptococcus anginosus	9.41	1_DT	Streptococcus anginosus	2.203
P033	2_DT	Streptococcus anginosus	9.429	2_DT	Streptococcus anginosus	2.282
P034	1_DT	Providencia stuartii	9.579	1_DT	Providencia stuartii	2.411
P034	2_DT	Providencia stuartii	9.25	2_DT	Providencia stuartii	2.529
P035	1_DT	Staphylococcus lugdunensis	9.155	1_DT	no reliable identification	1.597
P035	2_DT	Staphylococcus lugdunensis	7.89	2_DT	Staphylococcus lugdunensis	2.013
P036	1_DT	Enterococcus faecalis	9.561	1_DT	Enterococcus faecalis	2.256
P036	2_DT	Enterococcus faecalis	9.51	2_DT	Enterococcus faecalis	2.224
P037	1_DT	Streptococcus pyogenes	9.529	1_DT	Streptococcus pyogenes	2.225
P037	2_DT	Streptococcus pyogenes	9.178	2_DT	Streptococcus pyogenes	2.332
P038	1_DT	Achromobacter xylosoxidans	9.597	1_DT	Achromobacter xylosoxidans	2.306
P038	2_DT	Achromobacter xylosoxidans	9.512	2_DT	Achromobacter xylosoxidans	2.276
P039	1_DT	Bacteroides thetaiotaomicron	9.624	1_DT	Bacteroides thetaiotaomicron	2.306
P039	2_DT	Bacteroides thetaiotaomicron	9.589	2_DT	Bacteroides thetaiotaomicron	2.115
P040	1_DT	Streptococcus gallolyticus	9.589	1_DT	no reliable identification	1.425
P040	2_DT	Sphingobacterium anhuiense	5.797	2_DT	Streptococcus gallolyticus	2.179
P041	1_DT	Micrococcus luteus	9.41	1_DT	Micrococcus luteus	1.998
P041	2_DT	Micrococcus luteus	9.512	2_DT	Micrococcus luteus	2.056
P042	1_DT	Bacteroides fragilis	9.664	1_DT	Bacteroides fragilis	2.434
P042	2_DT	Bacteroides fragilis	9.658	2_DT	Bacteroides fragilis	2.426
P043	1_DT	Streptococcus pyogenes	9.245	1_DT	Streptococcus pyogenes	2.194
P043	2_DT	Streptococcus pyogenes	9.286	2_DT	Streptococcus pyogenes	2.317
P044	1_DT	Clostridium perfringens	9.707	1_DT	Clostridium perfringens	2.395
P044	2_DT	Clostridium perfringens	9.692	2_DT	Clostridium perfringens	2.289
P045	1_DT	Propionibacterium acnes	9.445	1_DT	Propionibacterium acnes	2.201
P045	2_DT	Propionibacterium acnes	9.172	2_DT	Propionibacterium acnes	2.04
P046	1_DT	Achromobacter xylosoxidans	9.494	1_DT	Achromobacter xylosoxidans	2.284
P046	2_DT	Achromobacter xylosoxidans	9.537	2_DT	Achromobacter xylosoxidans	2.267
P047	1_FA	Candida tropicalis	9.329	1_FA	Candida tropicalis	2.199
P047	2_FA	Candida tropicalis	9.277	2_FA	Candida tropicalis	2.036
P048	1_DT	Enterococcus faecium	9.648	1_DT	Enterococcus faecium	2.421
P048	2_DT	Enterococcus faecium	9.763	2_DT	Enterococcus faecium	2.431
P049	1_DT	Enterococcus faecium	9.635	1_DT	Enterococcus faecium	2.487
P049	2_DT	Enterococcus faecium	9.619	2_DT	Enterococcus faecium	2.443
P050	1_DT	Staphylococcus epidermidis	6.911	1_DT	Staphylococcus epidermidis	1.844
P050	2_DT	Staphylococcus epidermidis	9.397	2_DT	Staphylococcus epidermidis	2.002
P051	1_DT	Escherichia coli	9.611	1_DT	Escherichia coli	1.816
P051	2_DT	Escherichia coli	9.647	2_DT	Escherichia coli	2.303
P052	1_DT	Escherichia coli	9.726	1_DT	Escherichia coli	2.34
P052	2_DT	Escherichia coli	9.708	2_DT	Escherichia coli	2.337
P053	1_DT	Enterococcus faecalis	9.511	1_DT	Enterococcus faecalis	2.322
P053	2_DT	Enterococcus faecalis	9.613	2_DT	Enterococcus faecalis	1.708
P054	1_DT	Enterococcus faecium	9.328	1_DT	Enterococcus faecium	2.166
P054	2_DT	Enterococcus faecium	9.402	2_DT	no reliable identification	1.441
P055	1_DT	Proteus mirabilis	9.692	1_DT	Proteus mirabilis	2.378
P055	2_DT	Proteus mirabilis	9.704	2_DT	Proteus mirabilis	2.2
P056	1_DT	Enterococcus faecalis	9.571	1_DT	Enterococcus faecalis	2.186
P056	2_DT	Enterococcus faecalis	9.644	2_DT	Enterococcus faecalis	2.224
P057	1_DT	Klebsiella pneumoniae	9.602	1_DT	Klebsiella pneumoniae	2.3
P057	2_DT	Klebsiella pneumoniae subsp.pneumoniae	9.486	2_DT	Klebsiella pneumoniae	2.023
P058	1_DT	Escherichia coli	9.655	1_DT	Escherichia coli	2.384
P058	2_DT	Escherichia coli	9.586	2_DT	Escherichia coli	2.342
P059	1_DT	Enterococcus faecium	9.724	1_DT	Enterococcus faecium	2.456
P059	2_DT	Enterococcus faecium	9.73	2_DT	Enterococcus faecium	2.482
P060	1_FA	Candida tropicalis	9.35	1_FA	Candida tropicalis	2.055
P060	2_FA	Candida tropicalis	9.557	2_FA	Candida tropicalis	1.984
P061	1_DT	Escherichia coli	9.714	1_DT	Escherichia coli	2.341
P061	2_DT	Escherichia coli	9.717	2_DT	Escherichia coli	2.267
P062	1_FA	Candida albicans	9.415	1_FA	Candida albicans	1.961
P062	2_FA	Candida albicans	9.453	2_FA	Candida albicans	1.896
P062	3_EtOH/FA	Candida albicans	9.65	3_EtOH/FA	Candida albicans	2.256
P063	1_DT	Escherichia coli	9.581	1_DT	Escherichia coli	2.35
P063	2_DT	Escherichia coli	9.717	2_DT	Escherichia coli	2.336
P064	1_DT	Proteus mirabilis	9.561	1_DT	Proteus mirabilis	2.345
P064	2_DT	Proteus mirabilis	9.627	2_DT	Proteus mirabilis	2.239
P065	1_DT	Klebsiella pneumoniae	9.757	1_DT	Klebsiella pneumoniae	2.355
P065	2_DT	Klebsiella pneumoniae	9.709	2_DT	Klebsiella pneumoniae	2.438
P066	1_DT	Serratia marcescens	8.315	1_DT	Serratia marcescens	2.059	Serratia nematodiphila
P066	2_DT	Serratia marcescens	9.431	2_DT	Serratia ureilytica	2.136	Serratia nematodiphila
P067	1_DT	Staphylococcus epidermidis	7.914	1_DT	Staphylococcus epidermidis	2.04
P067	2_DT	Staphylococcus epidermidis	9.511	2_DT	Staphylococcus epidermidis	2.09
P068	1_DT	Enterococcus faecalis	9.478	1_DT	Enterococcus faecalis	2.327
P068	2_DT	Enterococcus faecalis	9.637	2_DT	Enterococcus faecalis	2.288
P069	1_DT	Staphylococcus epidermidis	6.613	1_DT	no reliable identification	1.658
P069	2_DT	Staphylococcus epidermidis	9.437	2_DT	Staphylococcus epidermidis	1.762
P069	3_FA	Staphylococcus epidermidis	9.257	3_FA	Staphylococcus epidermidis	2.175
P070	1_DT	Acinetobacter baumannii	9.582	1_DT	Acinetobacter baumannii	2.357
P070	2_DT	Acinetobacter baumannii	9.581	2_DT	Acinetobacter baumannii	2.3
P071	1_DT	Finegoldia magna	4.599	1_DT	Stenotrophomonas maltophilia	2.303
P071	2_DT	Stenotrophomonas maltophilia	5.566	2_DT	Stenotrophomonas maltophilia	2.078
P071	3_FA	Stenotrophomonas maltophilia	9.602	3_FA	Stenotrophomonas maltophilia	2.217
P072	1_DT	Staphylococcus aureus	9.522	1_DT	Staphylococcus aureus	2.092
P072	2_DT	Staphylococcus aureus	7.081	2_DT	Staphylococcus aureus	2.216
P073	1_DT	Acinetobacter baumannii	9.555	1_DT	Acinetobacter baumannii	2.288
P073	2_DT	Acinetobacter baumannii	9.535	2_DT	Acinetobacter baumannii	1.969
P074	1_DT	Enterococcus faecalis	9.63	1_DT	Enterococcus faecalis	2.236
P074	2_DT	Enterococcus faecalis	9.616	2_DT	Enterococcus faecalis	2.198
P075	1_DT	Enterococcus faecalis	9.546	1_DT	Enterococcus faecalis	2.217
P075	2_DT	Enterococcus faecalis	9.684	2_DT	Enterococcus faecalis	2.337
P076	1_DT	Streptococcus agalactiae	9.668	1_DT	Streptococcus agalactiae	2.137
P076	2_DT	Streptococcus agalactiae	9.658	2_DT	Streptococcus agalactiae	2.122
P077	1_DT	Enterococcus faecalis	9.543	1_DT	Enterococcus faecalis	2.275
P077	2_DT	Enterococcus faecalis	9.526	2_DT	Enterococcus faecalis	2.27
P078	1_DT	Enterobacter aerogenes	9.501	1_DT	Enterobacter aerogenes	2.236
P078	2_DT	Enterobacter aerogenes	9.356	2_DT	Enterobacter aerogenes	2.243
P079	1_DT	Pseudomonas aeruginosa	7.102	1_DT	Pseudomonas aeruginosa	2.349
P079	2_DT	Pseudomonas aeruginosa	9.29	2_DT	Pseudomonas aeruginosa	2.324
P080	1_DT	Enterobacter kobei	9.38	1_DT	Enterobacter asburiae	2.247
P080	2_DT	Enterobacter asburiae	9.573	2_DT	Enterobacter asburiae	2.254
P081	1_DT	Enterococcus faecalis	9.401	1_DT	Enterococcus faecalis	2.313
P081	2_DT	Enterococcus faecalis	9.663	2_DT	Enterococcus faecalis	2.322
P082	1_DT	Staphylococcus capitis	7.305	1_DT	Staphylococcus capitis	2.016
P082	2_DT	Staphylococcus capitis	9.302	2_DT	Staphylococcus capitis	2.115
P083	1_DT	Streptococcus agalactiae	9.549	1_DT	Streptococcus agalactiae	2.033
P083	2_DT	Streptococcus agalactiae	9.709	2_DT	Streptococcus agalactiae	2.158
P084	1_DT	Streptococcus anginosus	9.278	1_DT	Streptococcus anginosus	2.003
P084	2_DT	Streptococcus anginosus	9.502	2_DT	Streptococcus anginosus	2.193
P085	1_DT	Escherichia coli	9.608	1_DT	Escherichia coli	2.321
P085	2_DT	Escherichia coli	9.683	2_DT	Escherichia coli	2.355
P086	1_FA	Candida tropicalis	9.48	1_FA	Candida tropicalis	2.053
P086	2_FA	Candida tropicalis	9.413	2_FA	no peaks found	0
P087	1_DT	Veillonella parvula	9.587	1_DT	Veillonella parvula	2.148
P087	2_DT	Veillonella parvula	9.567	2_DT	Veillonella parvula	2.136
P088	1_DT	Proteus vulgaris	9.674	1_DT	Proteus vulgaris	2.121
P088	2_DT	Proteus vulgaris	9.629	2_DT	Proteus vulgaris	1.771
P089	1_FA	Candida orthopsilosis	9.321	1_FA	Candida orthopsilosis	1.779	Candida orthopsilosis
P089	2_FA	Candida orthopsilosis	9.303	2_FA	Candida orthopsilosis	1.82	Candida orthopsilosis
P089	3_EtOH/FA	Candida orthopsilosis	9.507	3_EtOH/FA	Candida orthopsilosis	1.8	Candida orthopsilosis
P090	1_DT	Serratia marcescens	9.372	1_DT	Serratia marcescens	1.772
P090	2_DT	Serratia marcescens	9.49	2_DT	Serratia marcescens	1.999
P090	3_FA	Serratia marcescens	9.507	3_FA	Serratia marcescens	2.142
P091	1_DT	Enterococcus faecium	9.728	1_DT	Enterococcus faecium	2.502
P091	2_DT	Enterococcus faecium	9.746	2_DT	Enterococcus faecium	2.478
P092	1_DT	Staphylococcus aureus	9.443	1_DT	Staphylococcus aureus	2.305
P092	2_DT	Staphylococcus aureus	9.417	2_DT	Staphylococcus aureus	2.104
P093	1_DT	Staphylococcus haemolyticus	9.439	1_DT	Staphylococcus haemolyticus	1.939
P093	2_DT	Staphylococcus haemolyticus	9.555	2_DT	Staphylococcus haemolyticus	1.987
P093	3_FA	Staphylococcus haemolyticus	9.68	3_FA	Staphylococcus haemolyticus	2.067
P094	1_DT	Enterobacter gergoviae	5.519	1_DT	Enterobacter asburiae	2.255
P094	2_DT	Enterobacter kobei	5.449	2_DT	Enterobacter asburiae	2.205
P094	3_FA	Enterobacter asburiae	9.509	3_FA	Enterobacter asburiae	2.401
P095	1_DT	Staphylococcus haemolyticus	9.078	1_DT	no reliable identification	1.648
P095	2_DT	Staphylococcus haemolyticus	9.136	2_DT	Staphylococcus haemolyticus	1.809
P095	3_FA	Staphylococcus haemolyticus	9.684	3_FA	Staphylococcus haemolyticus	2.101
P096	1_DT	Klebsiella pneumoniae	9.525	1_DT	Klebsiella pneumoniae	2.031
P096	2_DT	Klebsiella pneumoniae	9.555	2_DT	no reliable identification	1.663
P097	1_DT	Streptococcus parasanguinis	8.817	1_DT	no reliable identification	1.548	Streptococcus parasanguinis
P097	2_DT	Streptococcus parasanguinis	9.361	2_DT	Streptococcus parasanguinis	1.907	Streptococcus parasanguinis
P097	3_FA	Streptococcus parasanguinis	9.337	3_FA	Streptococcus parasanguinis	1.865	Streptococcus parasanguinis
P098	1_DT	Staphylococcus epidermidis	9.013	1_DT	Staphylococcus epidermidis	1.879
P098	2_DT	Staphylococcus epidermidis	9.343	2_DT	Staphylococcus epidermidis	2.146
P099	1_DT	Enterococcus avium	9.501	1_DT	no reliable identification	1.646
P099	2_DT	Enterococcus avium	9.523	2_DT	Enterococcus avium	2.049
P100	1_DT	Proteus mirabilis	9.472	1_DT	Proteus mirabilis	2.381
P100	2_DT	Proteus mirabilis	9.586	2_DT	Proteus mirabilis	2.303
P101	1_DT	Staphylococcus haemolyticus	9.196	1_DT	Staphylococcus haemolyticus	1.798
P101	2_DT	Staphylococcus haemolyticus	9.377	2_DT	Staphylococcus haemolyticus	2.102
P102	1_DT	Citrobacter braakii	9.525	1_DT	Citrobacter freundii	2.338
P102	2_DT	Citrobacter freundii	9.593	2_DT	Citrobacter freundii	2.332
P103	1_FA	Candida glabrata	7.022	1_FA	no reliable identification	1.543	Candida glabrata
P103	2_FA	Candida glabrata	9.018	2_FA	no reliable identification	1.538	Candida glabrata
P103	3_EtOH/FA	Candida glabrata	9.441	3_EtOH/FA	Candida glabrata	1.866	Candida glabrata
P104	1_DT	Haemophilus influenzae	9.621	1_DT	Haemophilus influenzae	2.426
P104	2_DT	Haemophilus influenzae	9.598	2_DT	Haemophilus influenzae	2.395
P105	1_DT	Streptococcus anginosus	8.988	1_DT	Streptococcus intermedius	2.238
P105	2_DT	Streptococcus intermedius	9.121	2_DT	Streptococcus intermedius	2.195
P106	1_DT	Pseudomonas stutzeri	9.548	1_DT	Pseudomonas stutzeri	1.986
P106	2_DT	Pseudomonas stutzeri	9.615	2_DT	Pseudomonas stutzeri	2.149
P107	1_DT	Parvimonas micra	9.175	1_DT	Parvimonas micra	2.061
P107	2_DT	Parvimonas micra	7.915	2_DT	Parvimonas micra	1.882
P108	1_DT	Klebsiella quasipneumoniae	9.594	1_DT	Klebsiella pneumoniae	2.028
P108	2_DT	Klebsiella quasipneumoniae	9.661	2_DT	Klebsiella pneumoniae	2.129
P109	1_FA	Candida albicans	9.554	1_FA	Candida albicans	1.982
P109	2_FA	Candida albicans	9.588	2_FA	Candida albicans	1.899
P109	3_EtOH/FA	Candida albicans	9.721	3_EtOH/FA	Candida albicans	2.061
P110	1_DT	Proteus mirabilis	9.661	1_DT	Proteus mirabilis	2.222
P110	2_DT	Proteus mirabilis	9.701	2_DT	Proteus mirabilis	2.314
P111	1_DT	Enterobacter ludwigii	9.38	1_DT	Enterobacter cloacae	2.283
P111	2_DT	Enterobacter ludwigii	9.19	2_DT	Enterobacter ludwigii	2.303
P112	1_DT	Streptococcus salivarius	9.503	1_DT	Streptococcus salivarius	2.242
P112	2_DT	Streptococcus salivarius	9.699	2_DT	Streptococcus salivarius	1.961
P113	1_DT	Enterobacter asburiae	9.549	1_DT	Enterobacter asburiae	2.193
P113	2_DT	Enterobacter cloacae	9.582	2_DT	Enterobacter asburiae	2.016
P114	1_FA	no results	0	1_FA	no reliable identification	1.462
P114	2_FA	no results	0	2_FA	Cryptococcus neoformans	1.805
P114	3_EtOH/FA	Cryptococcus neoformans	9.532	3_EtOH/FA	Cryptococcus neoformans	2.003
P115	1_DT	Enterococcus casseliflavus	9.613	1_DT	Enterococcus casseliflavus	2.199
P115	2_DT	Enterococcus casseliflavus	9.629	2_DT	Enterococcus casseliflavus	2.13
P116	1_DT	Streptococcus agalactiae	9.585	1_DT	Streptococcus agalactiae	2.128
P116	2_DT	Streptococcus agalactiae	9.623	2_DT	Streptococcus agalactiae	1.893
P117	1_DT	Klebsiella pneumoniae subsp.pneumoniae	9.544	1_DT	Klebsiella pneumoniae	2.05
P117	2_DT	Klebsiella pneumoniae subsp.pneumoniae	9.659	2_DT	Klebsiella pneumoniae	1.987
P118	1_DT	Staphylococcus epidermidis	9.477	1_DT	Staphylococcus epidermidis	2.099
P118	2_DT	Staphylococcus epidermidis	9.447	2_DT	Staphylococcus epidermidis	2.141
P119	1_DT	Moraxella sg Branhamella catarrhalis	9.639	1_DT	Moraxella sg Branhamella catarrhalis	2.46
P119	2_DT	Moraxella sg Branhamella catarrhalis	9.683	2_DT	Moraxella sg Branhamella catarrhalis	2.444
P120	1_DT	Klebsiella pneumoniae	9.419	1_DT	Klebsiella pneumoniae	2.054
P120	2_DT	Klebsiella pneumoniae	9.183	2_DT	Klebsiella pneumoniae	2.295
P121	1_DT	Enterobacter aerogenes	9.268	1_DT	Enterobacter aerogenes	2.275
P121	2_DT	Enterobacter aerogenes	9	2_DT	Enterobacter aerogenes	2.258
P122	1_DT	Bacteroides fragilis	9.266	1_DT	Bacteroides fragilis	2.295
P122	2_DT	Bacteroides fragilis	9.111	2_DT	Bacteroides fragilis	2.233
P123	1_DT	Rothia mucilaginosa	6.223	1_DT	no reliable identification	1.417
P123	2_DT	Rothia mucilaginosa	9.12	2_DT	no reliable identification	1.397
P123	3_FA	Rothia mucilaginosa	9.37	3_FA	Rothia mucilaginosa	2.117
P124	1_DT	Enterococcus raffinosus	9.747	1_DT	Enterococcus raffinosus	2.055
P124	2_DT	Enterococcus raffinosus	9.769	2_DT	Enterococcus raffinosus	2.327
P125	1_DT	Klebsiella oxytoca	9.553	1_DT	Klebsiella oxytoca	2.165
P125	2_DT	Klebsiella oxytoca	9.46	2_DT	Klebsiella oxytoca	2.213
P126	1_DT	Eggerthella lenta	8.967	1_DT	no peaks found	0	Eggerthella lenta
P126	2_DT	Clostridium symbiosum	4.814	2_DT	Eggerthella lenta	2.114	Eggerthella lenta
P126	3_FA	Clostridium symbiosum	6.56	3_FA	Eggerthella lenta	2.07	Eggerthella lenta
P127	1_DT	Staphylococcus capitis	9.375	1_DT	Staphylococcus capitis	1.868
P127	2_DT	Staphylococcus capitis	9.289	2_DT	no reliable identification	1.407
P127	3_FA	Staphylococcus capitis	9.612	3_FA	Staphylococcus capitis	2.067
P128	1_DT	Burkholderia cenocepacia	9.239	1_DT	Burkholderia metallica	2.231
P128	2_DT	Burkholderia pyrrocinia	9.297	2_DT	Burkholderia pyrrocinia	2.133
P129	1_DT	Citrobacter amalonaticus	9.278	1_DT	Citrobacter amalonaticus	2.363
P129	2_DT	Citrobacter amalonaticus	9.446	2_DT	Citrobacter amalonaticus	2.159
P130	1_FA	Candida albicans	9.508	1_FA	Candida albicans	2
P130	2_FA	Candida albicans	9.424	2_FA	no reliable identification	1.675
P131	1_DT	Streptococcus agalactiae	9.588	1_DT	no reliable identification	1.215
P131	2_DT	Streptococcus agalactiae	9.517	2_DT	Streptococcus agalactiae	1.97
P131	3_FA	Streptococcus agalactiae	9.663	3_FA	Streptococcus agalactiae	2.388
P132	1_DT	Citrobacter koseri	9.608	1_DT	Citrobacter koseri	1.798
P132	2_DT	Citrobacter koseri	9.605	2_DT	Citrobacter koseri	2.09
P133	1_DT	Staphylococcus epidermidis	5.897	1_DT	Staphylococcus epidermidis	2.131
P133	2_DT	Staphylococcus epidermidis	9.429	2_DT	Staphylococcus epidermidis	2.018
P134	1_DT	Hafnia alvei	9.514	1_DT	Hafnia alvei	2.299
P134	2_DT	Hafnia alvei	9.516	2_DT	Hafnia alvei	2.264
P135	1_FA	Candida parapsilosis	9.168	1_FA	Candida parapsilosis	2.004
P135	2_FA	Candida parapsilosis	9.192	2_FA	Candida parapsilosis	1.928
P136	1_DT	Salmonella sp.	9.746	1_DT	Salmonella sp	2.386
P136	2_DT	Salmonella sp.	9.519	2_DT	Salmonella sp	2.511
P137	1_DT	Corynebacterium striatum	9.415	1_DT	Corynebacterium striatum	2.291
P137	2_DT	Corynebacterium striatum	9.654	2_DT	Corynebacterium striatum	2.191
P138	1_DT	Citrobacter freundii	9.633	1_DT	Citrobacter freundii	2.37
P138	2_DT	Citrobacter freundii	9.576	2_DT	Citrobacter freundii	2.317
P139	1_DT	Corynebacterium striatum	9.115	1_DT	Corynebacterium striatum	2.343
P139	2_DT	Corynebacterium striatum	9.603	2_DT	Corynebacterium striatum	2.365
P140	1_DT	Stenotrophomonas maltophilia	9.59	1_DT	Stenotrophomonas maltophilia	2.254
P140	2_DT	Stenotrophomonas maltophilia	9.328	2_DT	Stenotrophomonas maltophilia	2.089
P141	1_DT	Streptococcus anginosus	9.655	1_DT	Streptococcus anginosus	2.169
P141	2_DT	Streptococcus anginosus	9.365	2_DT	Streptococcus anginosus	2.103
P142	1_DT	Enterococcus faecium	9.591	1_DT	Enterococcus faecium	2.379
P142	2_DT	Enterococcus faecium	9.515	2_DT	Enterococcus faecium	2.285
P143	1_DT	Haemophilus influenzae	9.496	1_DT	Haemophilus influenzae	2.225
P143	2_DT	Haemophilus influenzae	9.482	2_DT	Haemophilus influenzae	2.363
P144	1_DT	Serratia marcescens	9.515	1_DT	Serratia marcescens	2.24
P144	2_DT	Serratia marcescens	9.6	2_DT	Serratia marcescens	2.244
P145	1_DT	Acinetobacter baumannii	9.554	1_DT	Acinetobacter baumannii	2.158
P145	2_DT	Acinetobacter baumannii	9.577	2_DT	Acinetobacter baumannii	2.156
P146	1_DT	Staphylococcus epidermidis	9.383	1_DT	Staphylococcus epidermidis	2.107
P146	2_DT	Staphylococcus epidermidis	9.502	2_DT	Staphylococcus epidermidis	2.14
P147	1_DT	Pseudomonas aeruginosa	9.569	1_DT	Pseudomonas aeruginosa	2.285
P147	2_DT	Pseudomonas aeruginosa	9.674	2_DT	Pseudomonas aeruginosa	2.289
P148	1_DT	Stenotrophomonas maltophilia	9.69	1_DT	Stenotrophomonas maltophilia	2.209
P148	2_DT	Stenotrophomonas maltophilia	9.605	2_DT	Stenotrophomonas maltophilia	2.395
P149	1_DT	Pseudomonas aeruginosa	9.6	1_DT	Pseudomonas aeruginosa	2.204
P149	2_DT	Pseudomonas aeruginosa	9.583	2_DT	Pseudomonas aeruginosa	2.155
P150	1_DT	Moraxella sg Branhamella catarrhalis	7.972	1_DT	Moraxella_sg_Branhamella catarrhalis	2.528
P150	2_DT	Moraxella sg Branhamella catarrhalis	9.66	2_DT	Moraxella_sg_Branhamella catarrhalis	2.437
P151	1_DT	Staphylococcus aureus	9.603	1_DT	Staphylococcus aureus	2.273
P151	2_DT	Staphylococcus aureus	7.006	2_DT	Staphylococcus aureus	2.359
P152	1_DT	Pseudomonas aeruginosa	9.633	1_DT	Pseudomonas aeruginosa	2.284
P152	2_DT	Pseudomonas aeruginosa	9.568	2_DT	Pseudomonas aeruginosa	2.364
P153	1_DT	Staphylococcus aureus	9.377	1_DT	Staphylococcus aureus	2.174
P153	2_DT	Staphylococcus aureus	9.522	2_DT	Staphylococcus aureus	2.257
P154	1_DT	Acinetobacter pittii	9.632	1_DT	Acinetobacter pittii	2.098
P154	2_DT	Acinetobacter pittii	9.248	2_DT	Acinetobacter pittii	2.165
P155	1_DT	Pseudomonas aeruginosa	9.533	1_DT	Pseudomonas aeruginosa	2.268
P155	2_DT	Pseudomonas aeruginosa	9.65	2_DT	Pseudomonas aeruginosa	2.275
P156	1_DT	Acinetobacter guillouiae	8.708	1_DT	Acinetobacter bereziniae	2.133	Acinetobacter bereziniae
P156	2_DT	Acinetobacter guillouiae	9.127	2_DT	Acinetobacter bereziniae	2.177	Acinetobacter bereziniae
P157	1_DT	Streptococcus agalactiae	9.087	1_DT	Streptococcus agalactiae	2.163
P157	2_DT	Streptococcus agalactiae	9.611	2_DT	Streptococcus agalactiae	2.202
P158	1_DT	Staphylococcus epidermidis	6.829	1_DT	Staphylococcus epidermidis	1.998
P158	2_DT	Staphylococcus epidermidis	9.075	2_DT	Staphylococcus epidermidis	2.184
P159	1_DT	Pseudomonas aeruginosa	9.648	1_DT	Pseudomonas aeruginosa	2.401
P159	2_DT	Pseudomonas aeruginosa	9.666	2_DT	Pseudomonas aeruginosa	2.381
P160	1_DT	Staphylococcus epidermidis	9.193	1_DT	Staphylococcus epidermidis	2.318
P160	2_DT	Staphylococcus epidermidis	9.599	2_DT	Staphylococcus epidermidis	2.276
P161	1_DT	Citrobacter koseri	9.67	1_DT	Citrobacter koseri	2.398
P161	2_DT	Citrobacter koseri	9.58	2_DT	Citrobacter koseri	2.413
P162	1_DT	Enterobacter aerogenes	9.659	1_DT	Enterobacter aerogenes	2.439
P162	2_DT	Enterobacter aerogenes	9.676	2_DT	Enterobacter aerogenes	2.331
P163	1_DT	Staphylococcus aureus	9.428	1_DT	Staphylococcus aureus	2.08
P163	2_DT	Staphylococcus aureus	9.62	2_DT	Staphylococcus aureus	2.193
P164	1_DT	Pseudomonas aeruginosa	9.683	1_DT	Pseudomonas aeruginosa	2.325
P164	2_DT	Pseudomonas aeruginosa	9.536	2_DT	Pseudomonas aeruginosa	2.418
P165	1_DT	Acinetobacter baumannii	9.561	1_DT	Acinetobacter baumannii	2.09
P165	2_DT	Acinetobacter baumannii	9.599	2_DT	Acinetobacter baumannii	2.234
P166	1_DT	Enterococcus faecium	9.589	1_DT	Enterococcus faecium	2.408
P166	2_DT	Enterococcus faecium	9.271	2_DT	Enterococcus faecium	2.469
P167	1_DT	Klebsiella pneumoniae	9.492	1_DT	Klebsiella pneumoniae	2.284
P167	2_DT	Klebsiella pneumoniae subsp.ozaenae	9.559	2_DT	Klebsiella pneumoniae	2.352
P168	1_DT	Enterococcus faecium	9.648	1_DT	Enterococcus faecium	2.558
P168	2_DT	Enterococcus faecium	9.526	2_DT	Enterococcus faecium	2.51
P169	1_DT	Staphylococcus aureus	9.378	1_DT	Staphylococcus aureus	2.291
P169	2_DT	Staphylococcus aureus	6.166	2_DT	Staphylococcus aureus	2.286
P170	1_DT	Escherichia coli	9.051	1_DT	Escherichia coli	2.425
P170	2_DT	Escherichia coli	9.598	2_DT	Escherichia coli	2.497
P171	1_FA	Candida parapsilosis	9.28	1_FA	no reliable identification	1.526
P171	2_FA	Candida parapsilosis	8.242	2_FA	no reliable identification	1.696
P171	3_EtOH/FA	Candida parapsilosis	9.61	3_EtOH/FA	Candida parapsilosis	2.039
P172	1_FA	Candida tropicalis	8.453	1_FA	Candida tropicalis	1.804
P172	2_FA	Candida tropicalis	9.031	2_FA	Candida tropicalis	2.006
P173	1_DT	Enterococcus faecium	9.591	1_DT	Enterococcus faecium	2.559
P173	2_DT	Enterococcus faecium	9.7	2_DT	Enterococcus faecium	2.425
P174	1_FA	Candida albicans	7.848	1_FA	Candida albicans	1.93
P174	2_FA	Candida albicans	9.297	2_FA	Candida albicans	1.981
P174	3_EtOH/FA	Candida albicans	9.681	3_EtOH/FA	Candida albicans	2.01
P175	1_DT	Klebsiella pneumoniae	9.751	1_DT	Klebsiella pneumoniae	2.501
P175	2_DT	Klebsiella pneumoniae	9.726	2_DT	Klebsiella pneumoniae	2.397
P176	1_FA	Bacillus subtilis subsp.spizizenii	4.729	1_FA	no reliable identification	1.482	Candida auris
P176	2_FA	Lodderomyces elongisporus	5.048	2_FA	no reliable identification	1.205	Candida auris
P176	3_EtOH/FA	Alteromonas genovensis	5.401	3_EtOH/FA	Candida auris	2.031	Candida auris
P177	1_DT	Candida glabrata	8.914	1_FA	no reliable identification	1.517
P177	2_DT	Candida glabrata	9.444	2_FA	no reliable identification	1.319
P177	3_EtOH/FA	Candida glabrata	9.654	3_EtOH/FA	Candida glabrata	2.008
P178	1_FA	Candida glabrata	8.406	1_FA	no reliable identification	1.301
P178	2_FA	Candida glabrata	9.334	2_FA	no reliable identification	1.36
P178	3_EtOH/FA	Candida glabrata	9.591	3_EtOH/FA	Candida glabrata	2.091
P179	1_DT	Acinetobacter baumannii	9.605	1_DT	Acinetobacter baumannii	2.045
P179	2_DT	Acinetobacter baumannii	9.601	2_DT	Acinetobacter nosocomialis	2.06
P180	1_DT	Staphylococcus hominis	9.515	1_DT	Staphylococcus hominis	1.945
P180	2_DT	Staphylococcus hominis	9.523	2_DT	Staphylococcus hominis	2.089
P181	1_DT	Enterobacter cloacae	9.527	1_DT	Enterobacter cloacae	2.18
P181	2_DT	Enterobacter cloacae	9.452	2_DT	Enterobacter cloacae	2.248
P182	1_FA	Propionibacterium acnes	4.755	1_FA	no reliable identification	1.279	Candida auris
P182	2_FA	Bacillus subtilis subsp.spizizenii	4.636	2_FA	no reliable identification	1.273	Candida auris
P182	3_EtOH/FA	Candida duobushaemulonii	4.714	3_EtOH/FA	Candida auris	1.892	Candida auris
P183	1_DT	Enterobacter asburiae	9.23	1_DT	Enterobacter kobei	2.128
P183	2_DT	Enterobacter cloacae	9.405	2_DT	Enterobacter asburiae	2.177
P184	1_DT	Clostridium difficile	5.758	1_DT	Clostridium difficile	2.06
P184	2_DT	Shimia marina	4.326	2_DT	Clostridium difficile	2.004
P184	3_FA	Clostridium difficile	9.166	3_FA	Clostridium difficile	1.714
P185	1_DT	Haemophilus influenzae	9.603	1_DT	Haemophilus influenzae	2.309
P185	2_DT	Haemophilus influenzae	9.652	2_DT	Haemophilus influenzae	2.262
P186	1_DT	Haemophilus parainfluenzae	9.138	1_DT	Haemophilus parainfluenzae	2.275
P186	2_DT	Haemophilus parainfluenzae	9.203	2_DT	Haemophilus parainfluenzae	2.295
ATCC14053	1_FA	Candida albicans	9.355	1_FA	Candida albicans	2.02
ATCC14053	2_FA	Candida albicans	9.244	2_FA	Candida albicans	1.82
ATCC17666	1_DT	Stenotrophomonas maltophilia	9.653	1_DT	Stenotrophomonas maltophilia	2.002
ATCC17666	2_DT	Stenotrophomonas maltophilia	9.598	2_DT	Stenotrophomonas maltophilia	2
ATCC19258	1_DT	Streptococcus salivarius	9.633	1_DT	no reliable identification	1.279
ATCC19258	2_DT	Streptococcus salivarius	9.651	2_DT	no reliable identification	1.224
ATCC22019	1_FA	Candida parapsilosis	9.275	1_FA	Candida parapsilosis	2.281
ATCC22019	2_FA	Candida parapsilosis	9.483	2_FA	Candida parapsilosis	2.288
ATCC25922	1_DT	Escherichia coli	9.598	1_DT	Escherichia coli	2.291
ATCC25922	2_DT	Escherichia coli	9.647	2_DT	Escherichia coli	2.51
ATCC27853	1_DT	Pseudomonas aeruginosa	9.568	1_DT	Pseudomonas aeruginosa	2.494
ATCC27853	2_DT	Pseudomonas aeruginosa	9.58	2_DT	Pseudomonas aeruginosa	2.362
ATCC29213	1_DT	Staphylococcus aureus	9.647	1_DT	Staphylococcus aureus	1.954
ATCC29213	2_DT	Staphylococcus aureus	9.607	2_DT	Staphylococcus aureus	2.363
ATCC35218	1_DT	Escherichia coli	9.73	1_DT	Escherichia coli	2.275
ATCC35218	2_DT	Escherichia coli	9.639	2_DT	Escherichia coli	2.115
ATCC49619	1_DT	Streptococcus pneumoniae	9.471	1_DT	Streptococcus pneumoniae	2.079
ATCC49619	2_DT	Streptococcus mitis	9.255	2_DT	Streptococcus pneumoniae	2.118
ATCC700323	1_DT	Enterobacter cloacae	9.602	1_DT	Enterobacter cloacae	2.125
ATCC700323	2_DT	Enterobacter cloacae	9.555	2_DT	Enterobacter cloacae	2.151
ATCC700327	1_DT	Enterococcus casseliflavus	9.48	1_DT	Enterococcus casseliflavus	1.826
ATCC700327	2_DT	Enterococcus casseliflavus	9.545	2_DT	no reliable identification	1.627
ATCC700327	3_FA	Enterococcus casseliflavus	9.634	3_FA	Enterococcus casseliflavus	2.09
ATCC700603	1_DT	Klebsiella pneumoniae	9.657	1_DT	Klebsiella pneumoniae	2.039
ATCC700603	2_DT	Klebsiella quasipneumoniae	9.583	2_DT	Klebsiella pneumoniae	2.267
P187	1_DT	Morganella morganii	9.724	1_DT	Morganella morganii	2.41
P187	2_DT	Morganella morganii	9.774	2_DT	Morganella morganii	2.336
P188	1_DT	Morganella morganii	9.762	1_DT	Morganella morganii	2.377
P188	2_DT	Morganella morganii	9.778	2_DT	Morganella morganii	2.474
P189	1_DT	Morganella morganii	9.632	1_DT	Morganella morganii	2.453
P189	2_DT	Morganella morganii	9.733	2_DT	Morganella morganii	2.331
P190	1_DT	Proteus mirabilis	9.673	1_DT	Proteus mirabilis	2.192
P190	2_DT	Proteus mirabilis	9.664	2_DT	Proteus mirabilis	2.232
P191	1_DT	Staphylococcus aureus	9.429	1_DT	Staphylococcus aureus	2.325
P191	2_DT	Staphylococcus aureus	9.703	2_DT	Staphylococcus aureus	1.997
P192	1_DT	Streptococcus agalactiae	9.662	1_DT	Streptococcus agalactiae	2.041
P192	2_DT	Streptococcus agalactiae	9.615	2_DT	Streptococcus agalactiae	2.063
P193	1_DT	Neisseria gonorrhoeae	9.4	1_DT	Neisseria gonorrhoeae	2.334
P193	2_DT	Neisseria gonorrhoeae	9.042	2_DT	Neisseria gonorrhoeae	2.281
